# Supplementary material for: Object cloning using constrained mean value interpolation
Source: Springer Nature journal article supplement (doi:10.1007/s00371-012-0722-z), 2012-05-11
Supplement: 371_2012_722_MOESM1_ESM.pdf [file 371_2012_722_MOESM1_ESM.pdf]

# Object Cloning Using Constrained Mean Value Interpolation (Supplementary Material)

Hui Du                      Xiaogang Jin

Received: date / Accepted: date

This supplementary file contains a high resolution version of the examples of our paper and more results by our approach. We show the results for the compositing images. For each example, we show the source image, the destination image, an alpha matte of the object we want to clone, the result of direct cutting and pasting, the alpha blending result, the result obtained using Ding et al.'s method, the result of mean value cloning followed by alpha blending, the result of Xie et al.'s method, and the result obtained using our proposed method. Besides, we also show some results of Chen's approach and Zhang's approach. The video object cloning examples are shown in the supplementary video.

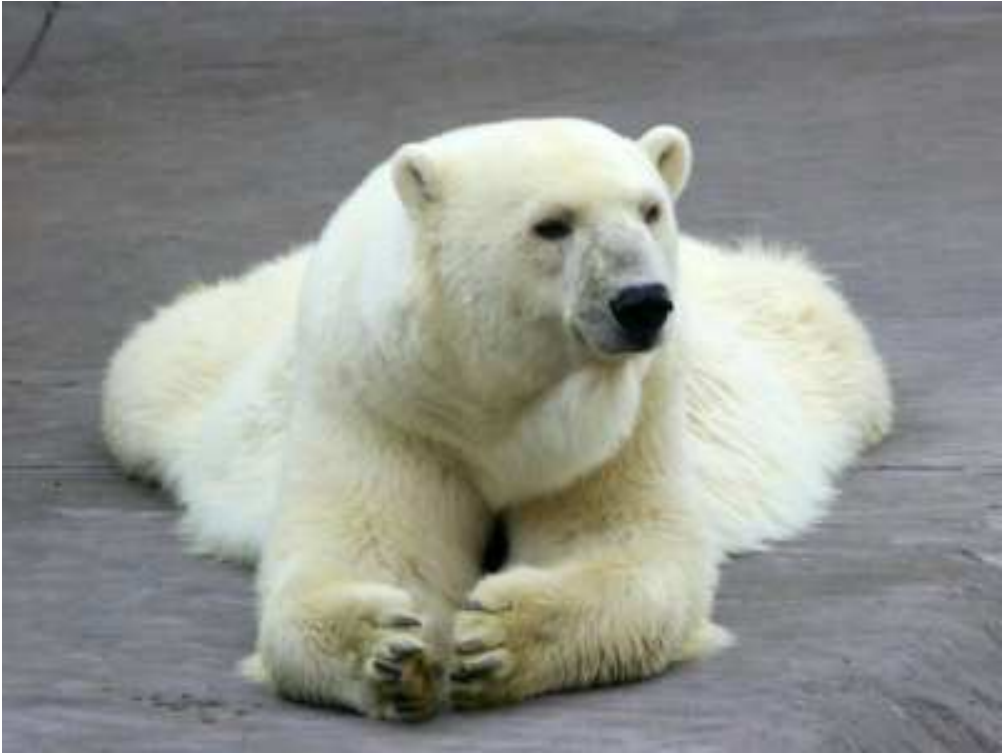

Figure 1: The source image.

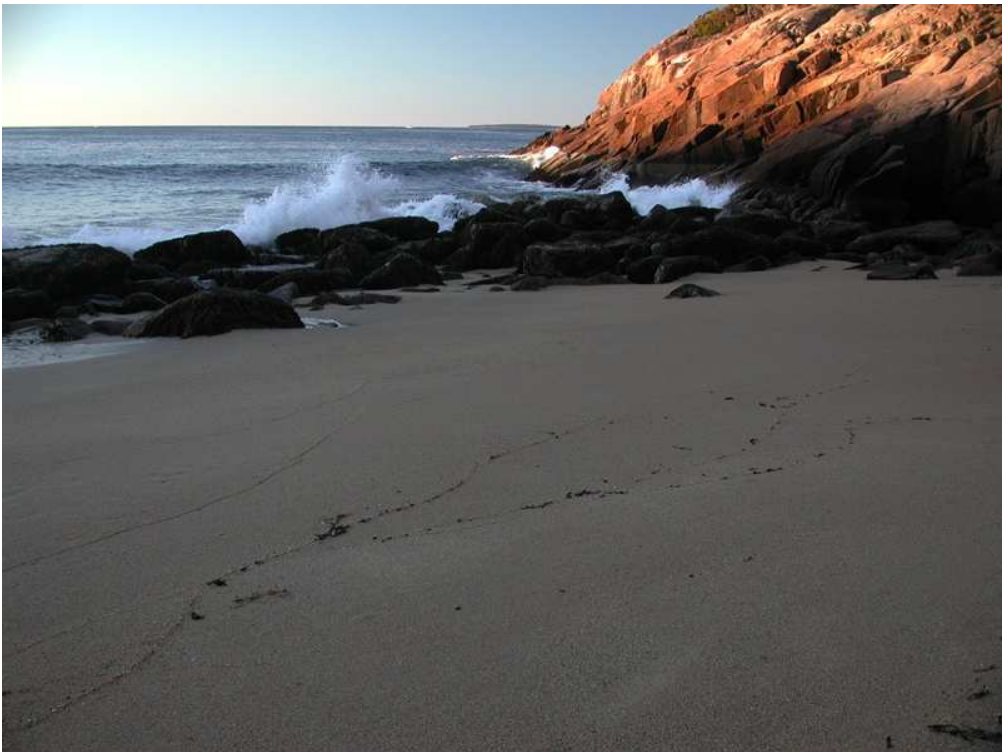

Figure 2: The destination image.

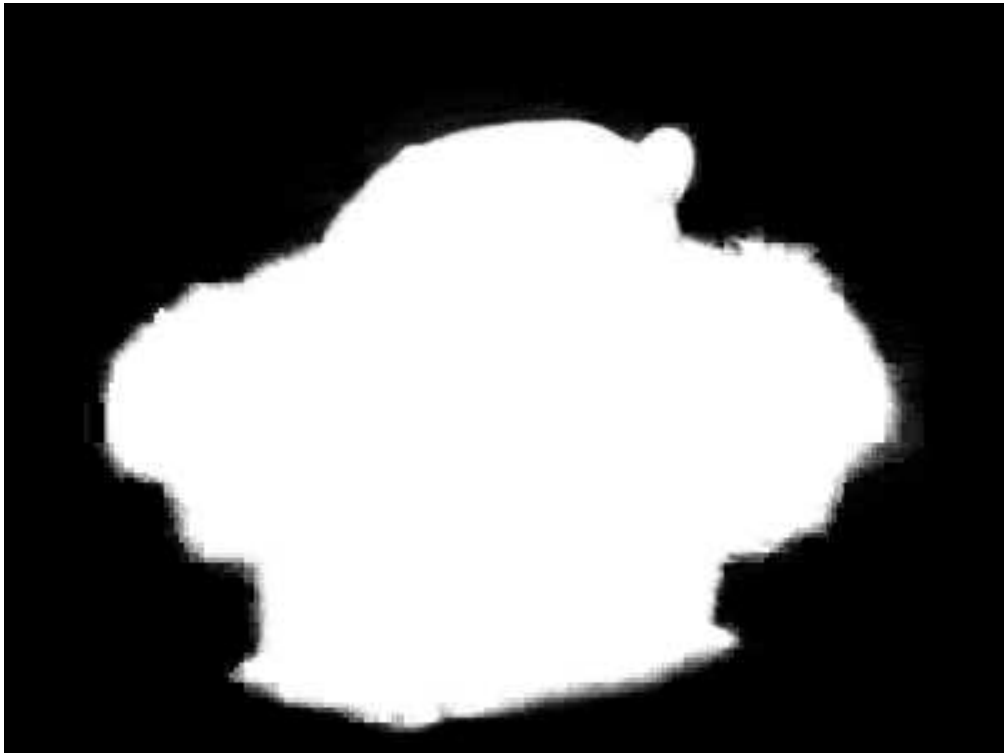

Figure 3: An alpha matte of the object.

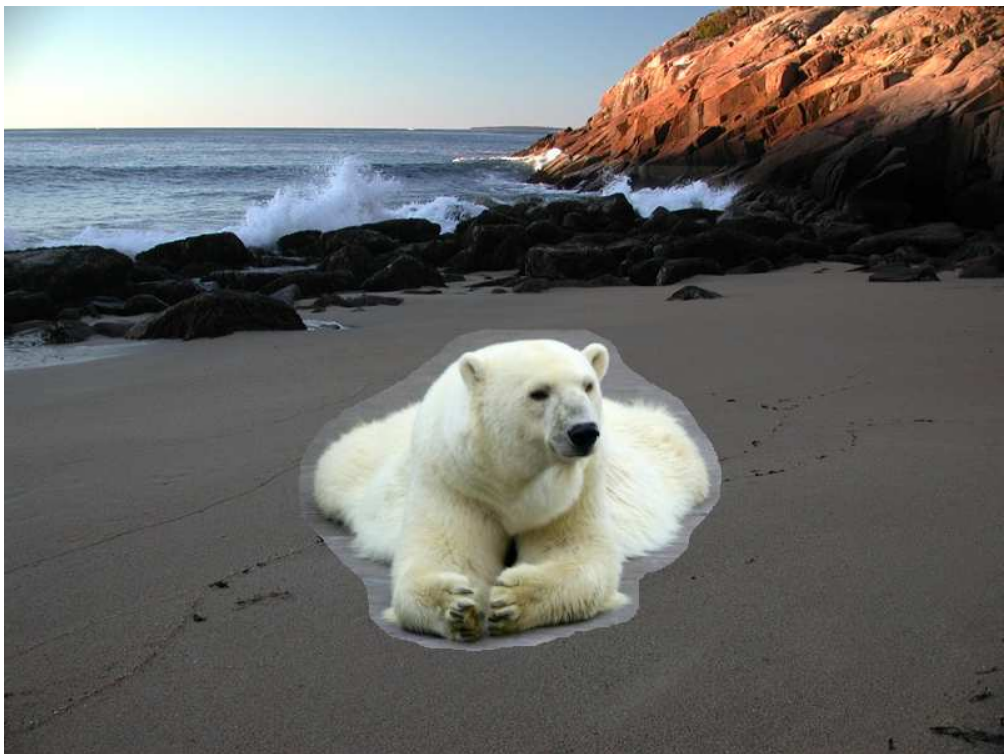

Figure 4: The result of direct cutting and pasting.

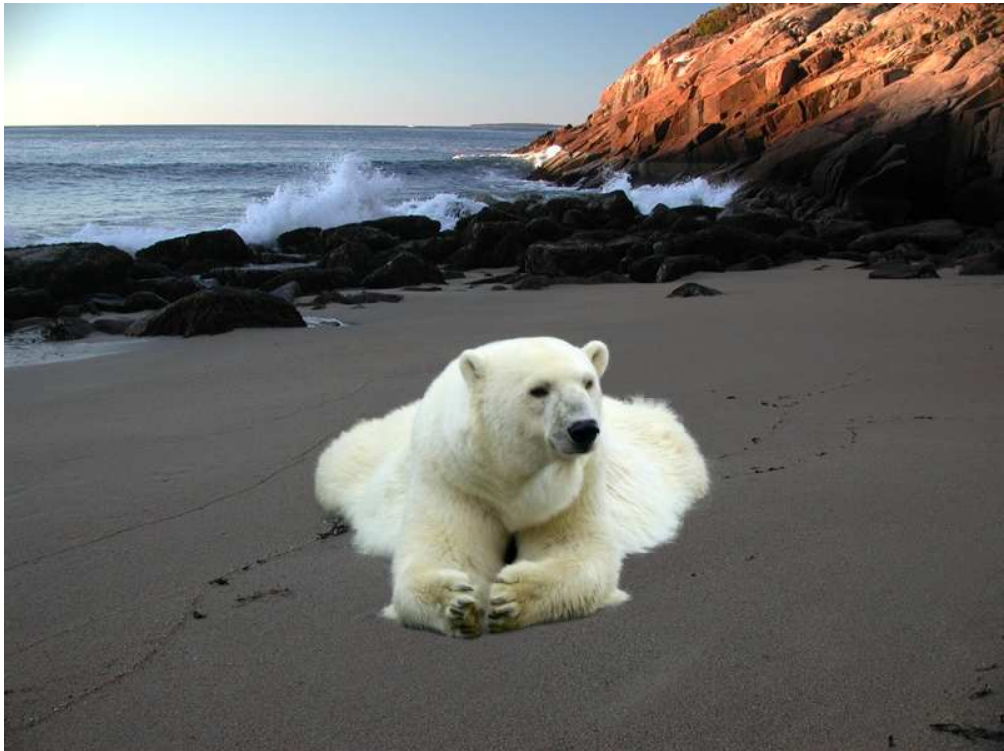

Figure 5: The result of alpha blending.

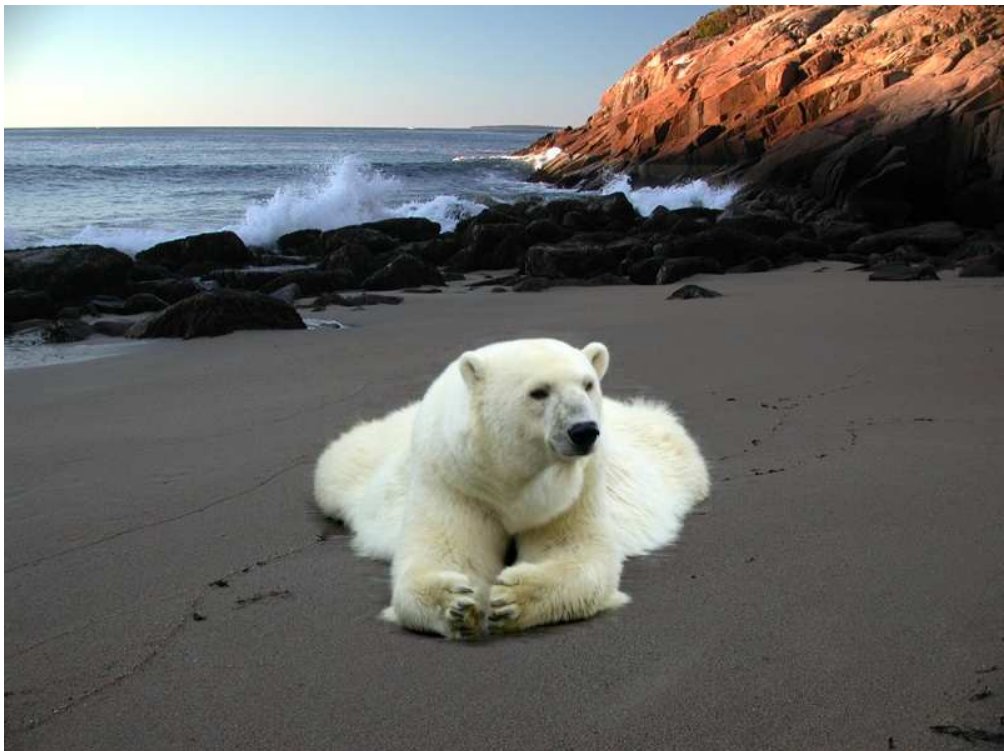

Figure 6: The result of Ding et al.'s method.

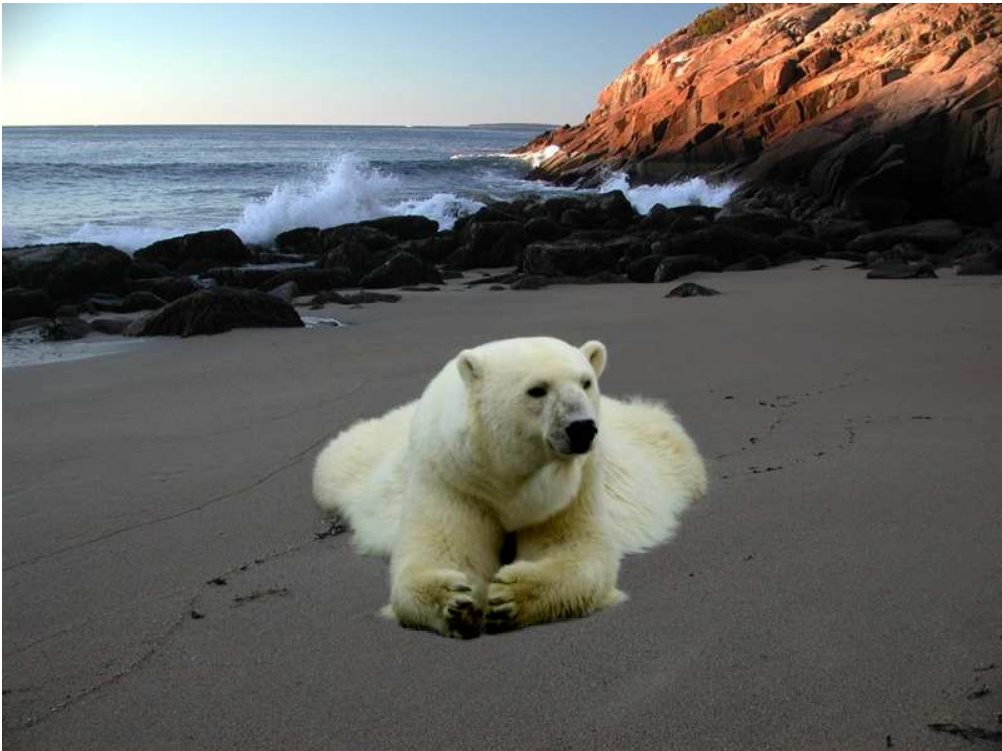

Figure 7: Mean value cloning followed by alpha blending.

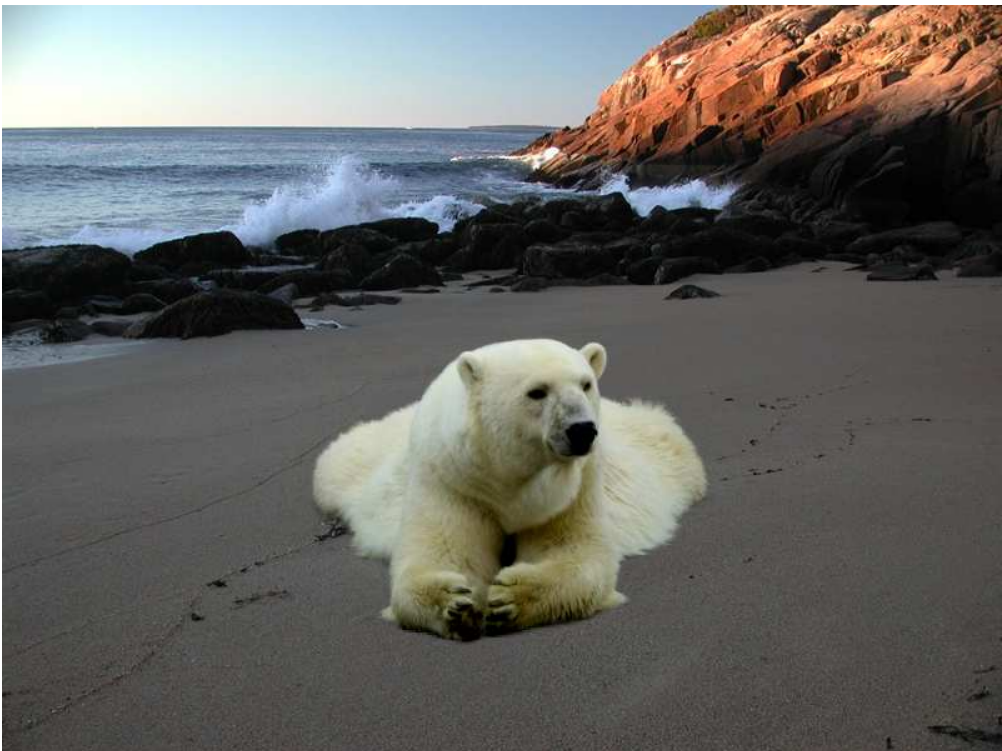

Figure 8: The result of Xie et al.'s method.

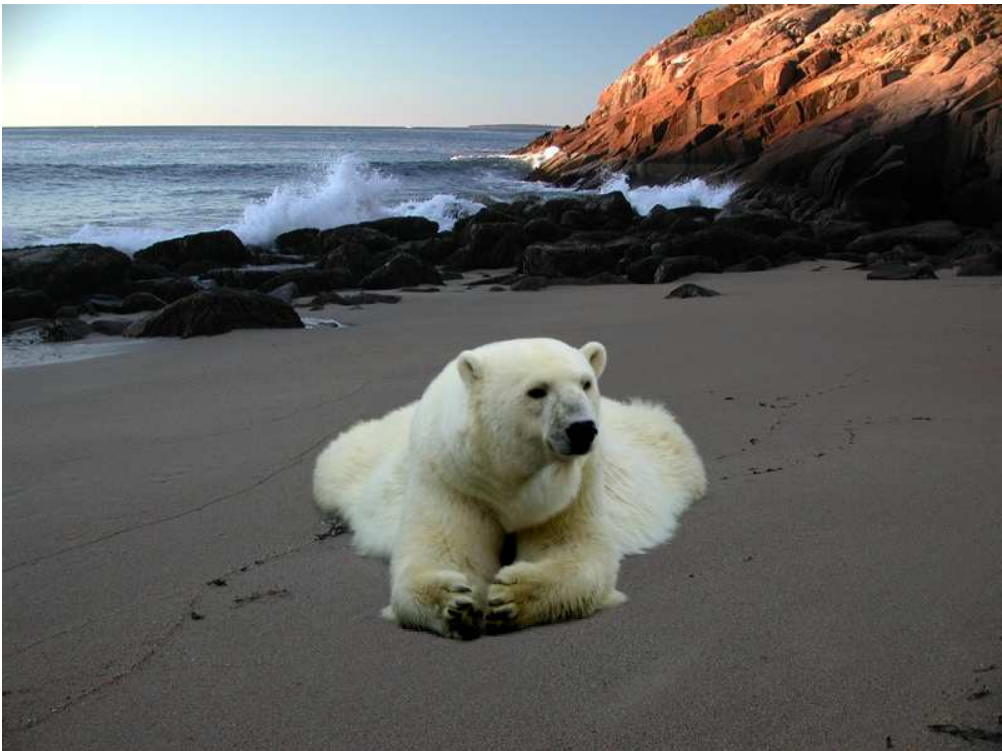

Figure 9: Our result.

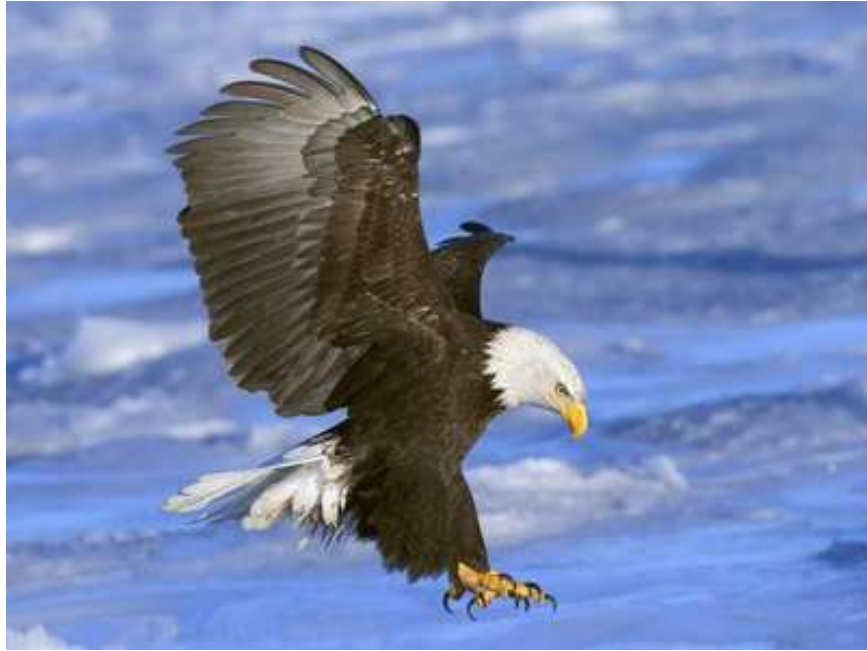

Figure 10: The source image.

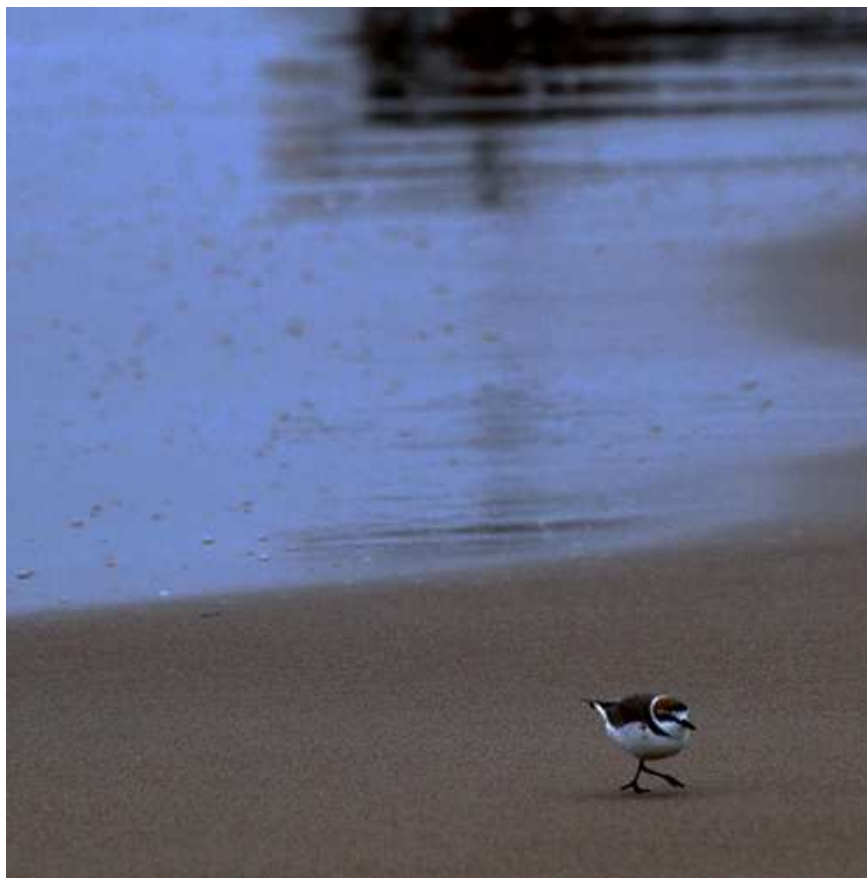

Figure 11: The destination image.

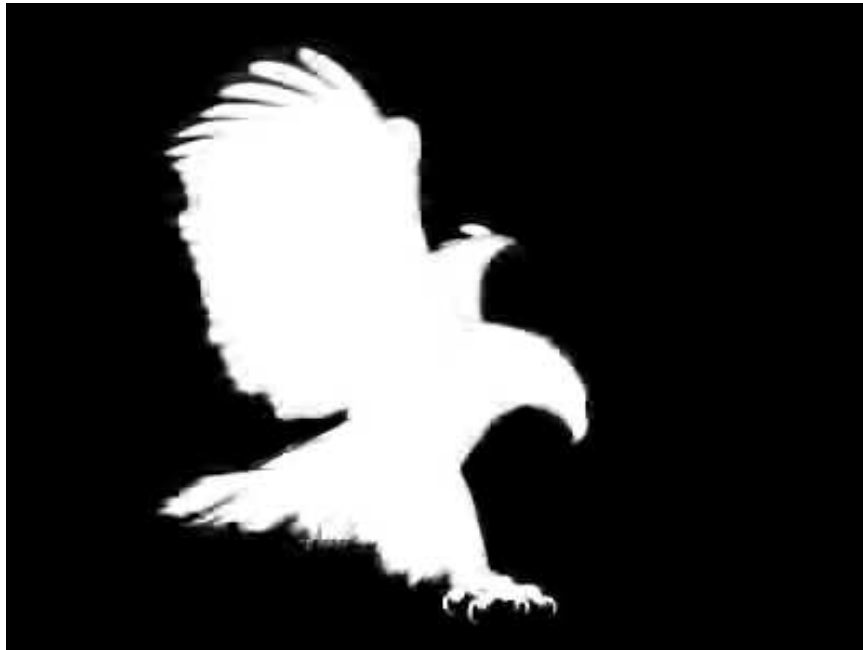

Figure 12: An alpha matte of the object.

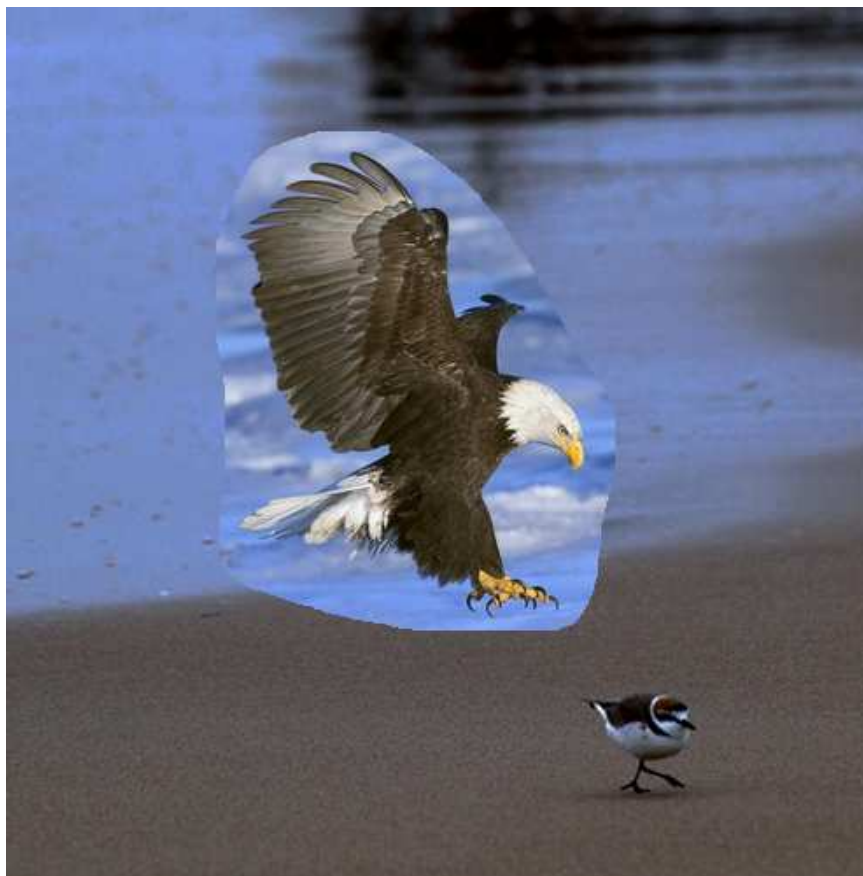

Figure 13: The result of direct cutting and pasting.



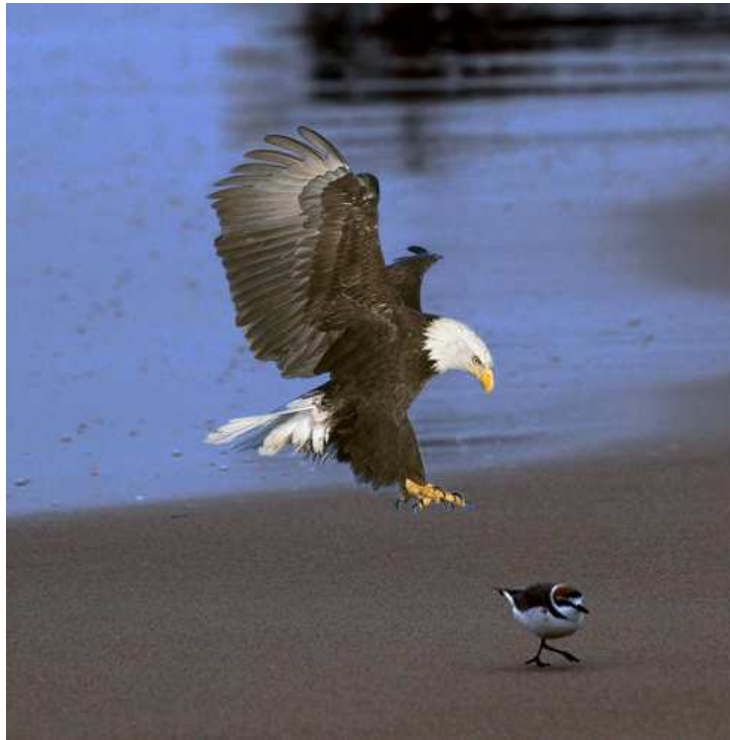

Figure 14: The result of alpha blending.

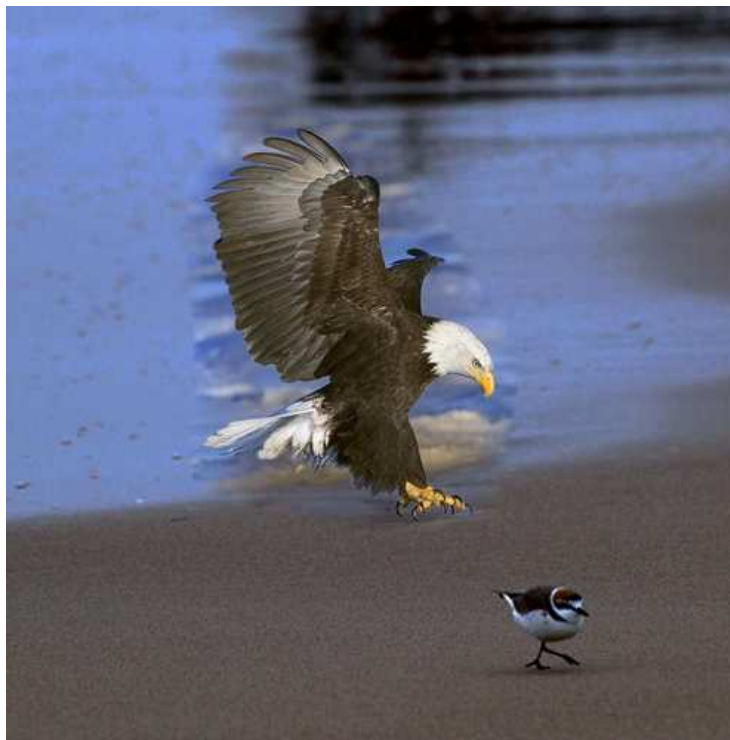

Figure 15: The result of Ding et al.'s method.

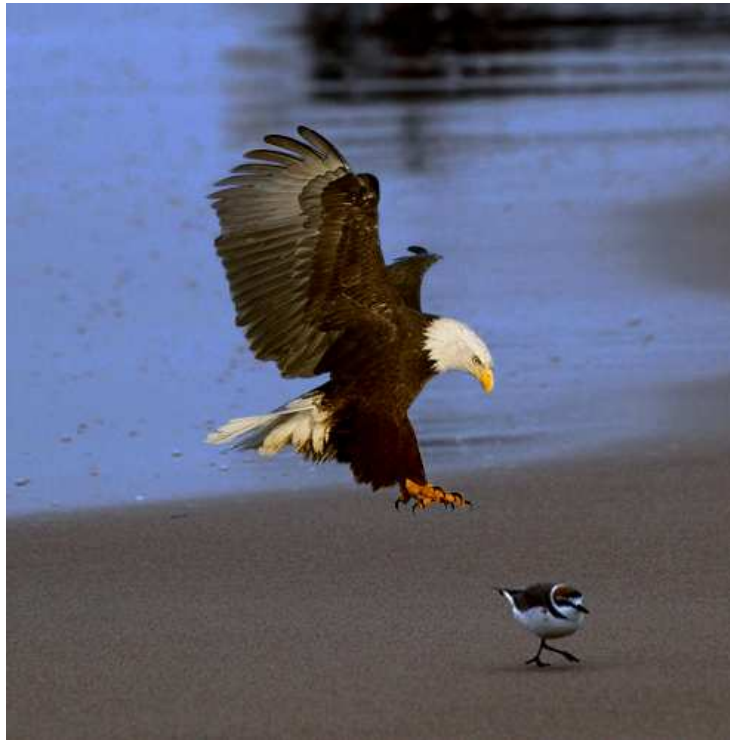

Figure 16: Mean value cloning followed by alpha blending.

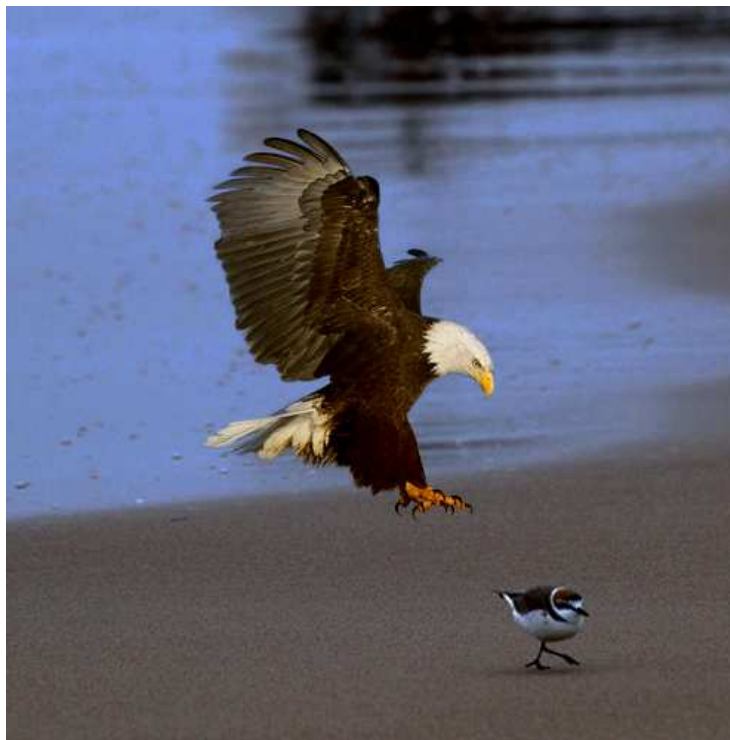

Figure 17: The result of Xie et al.'s method.

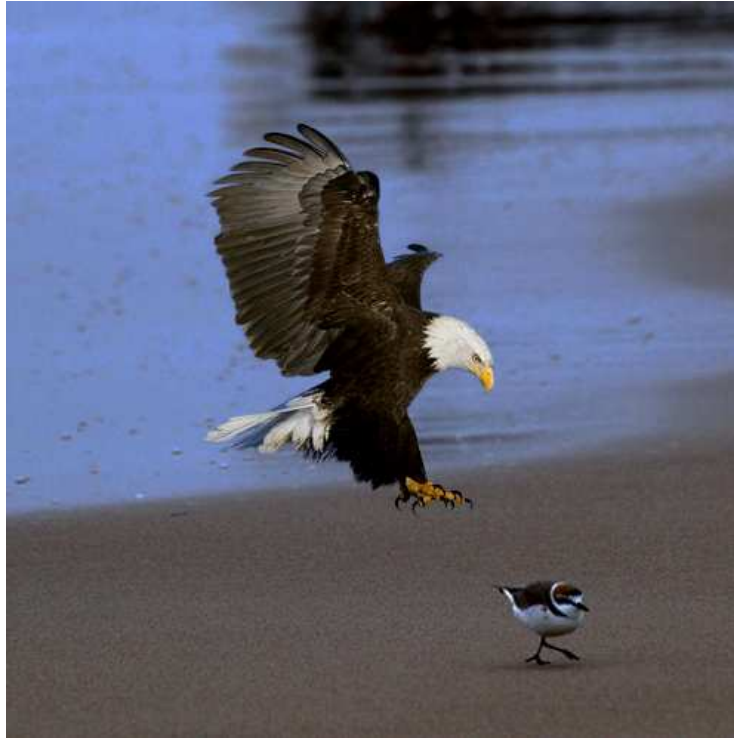

Figure 18: Our result.

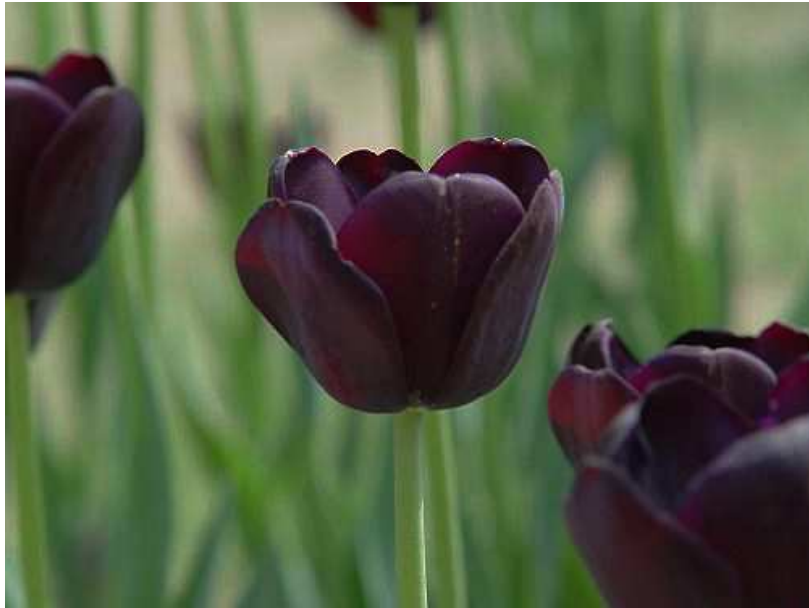

Figure 19: The source image.

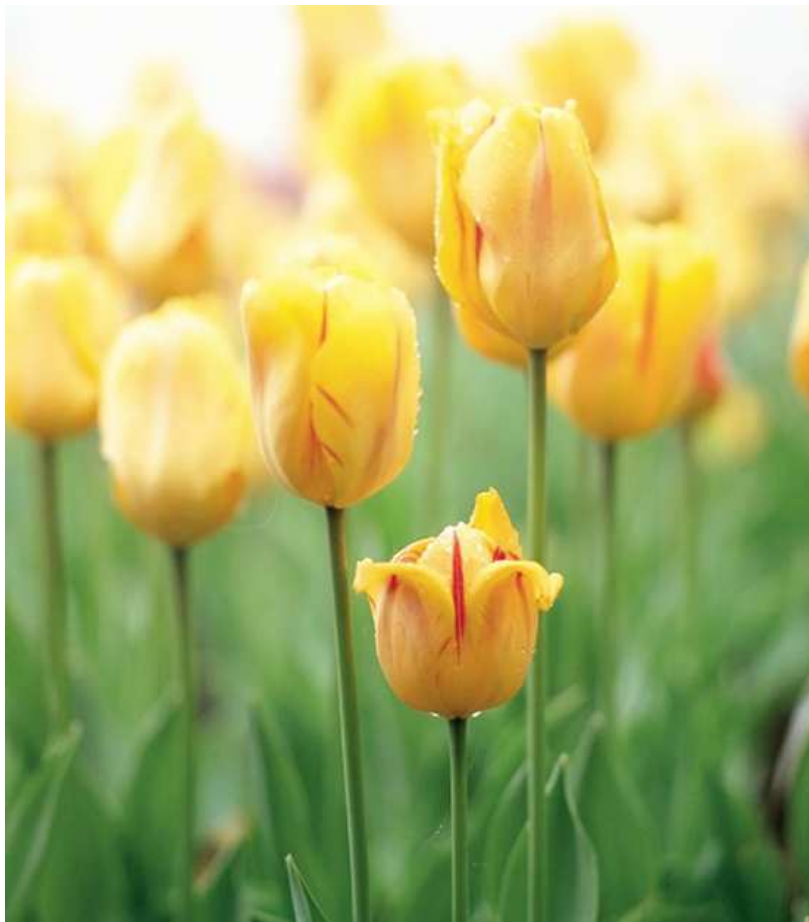

Figure 20: The destination image.

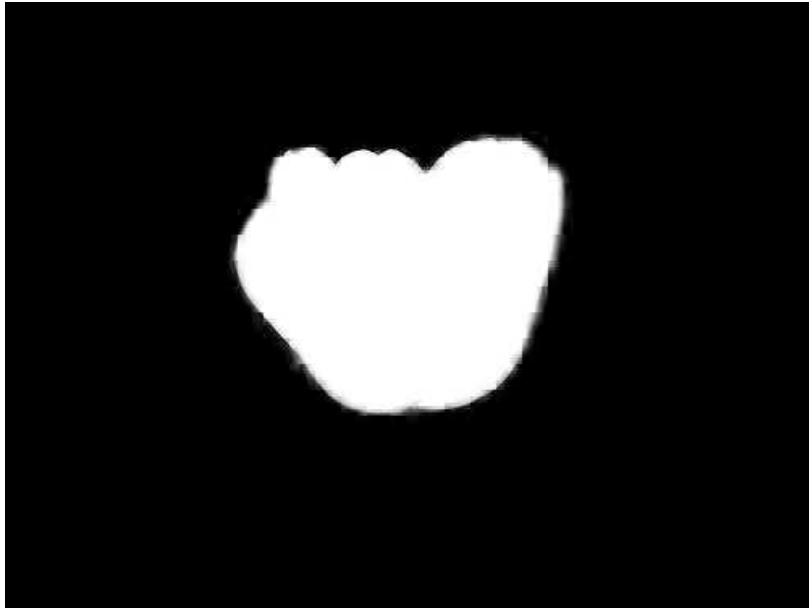

Figure 21: An alpha matte of the object.

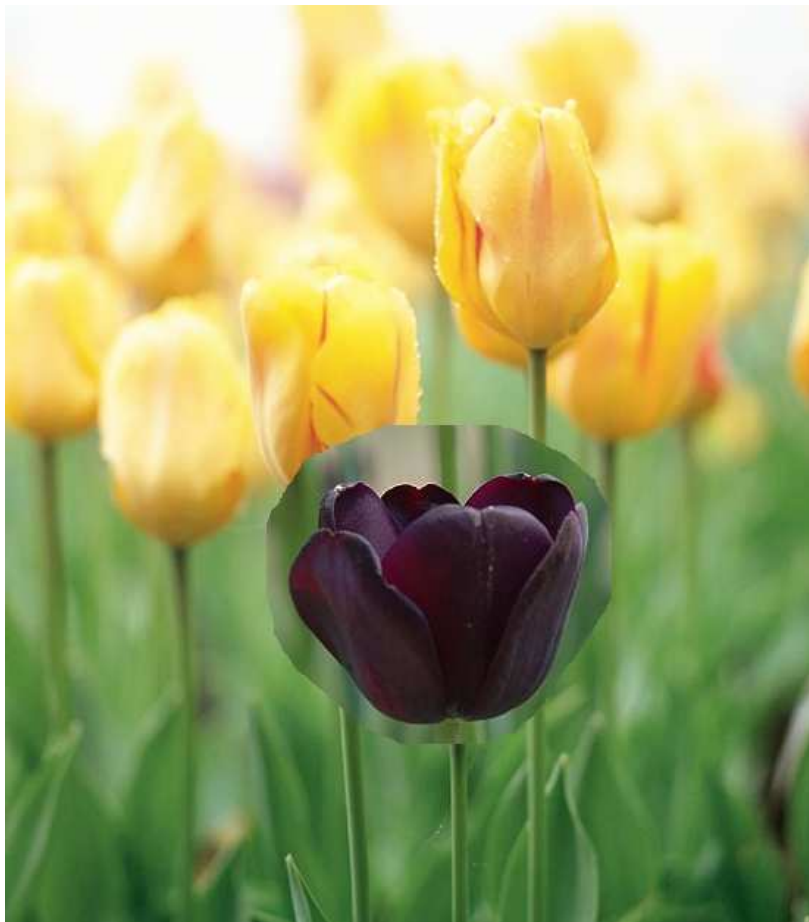

Figure 22: The result of direct cutting and pasting.

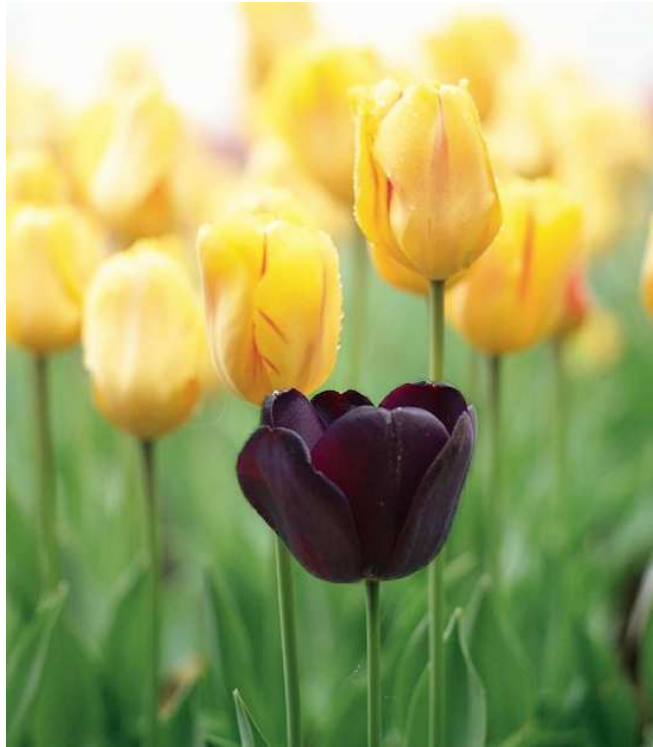

Figure 23: The result of alpha blending.

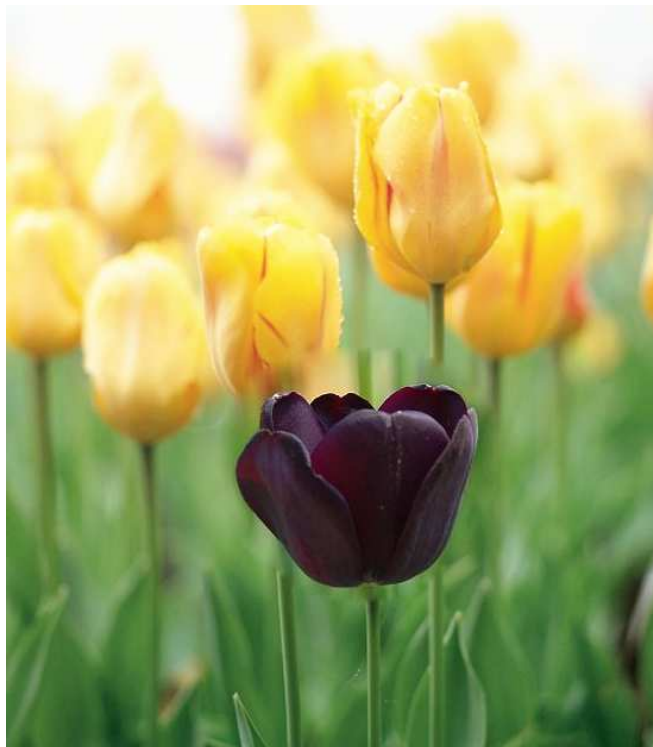

Figure 24: The result of Ding et al.'s method.

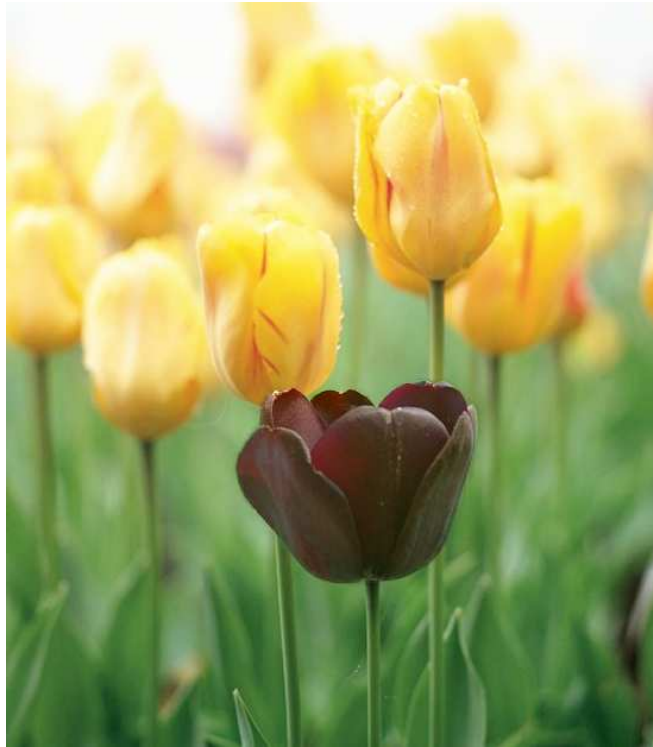

Figure 25: Mean value cloning followed by alpha blending.

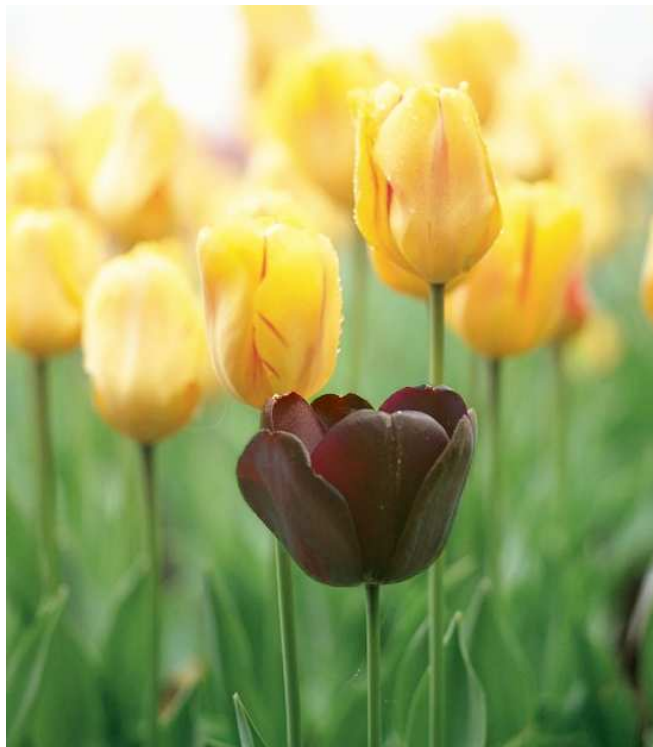

Figure 26: The result of Xie et al.'s method.

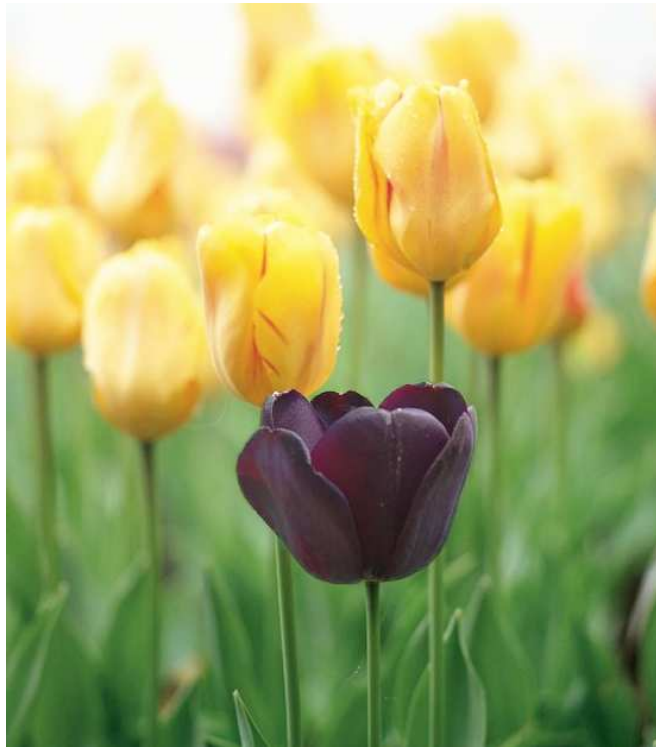

Figure 27: Our result.



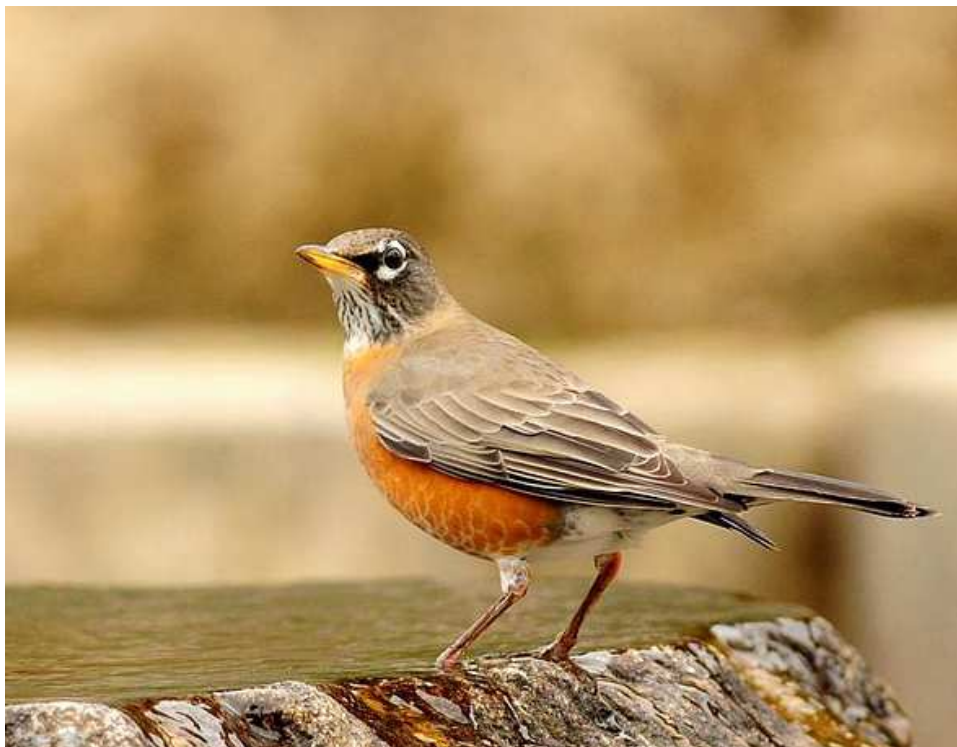

Figure 28: The source image.

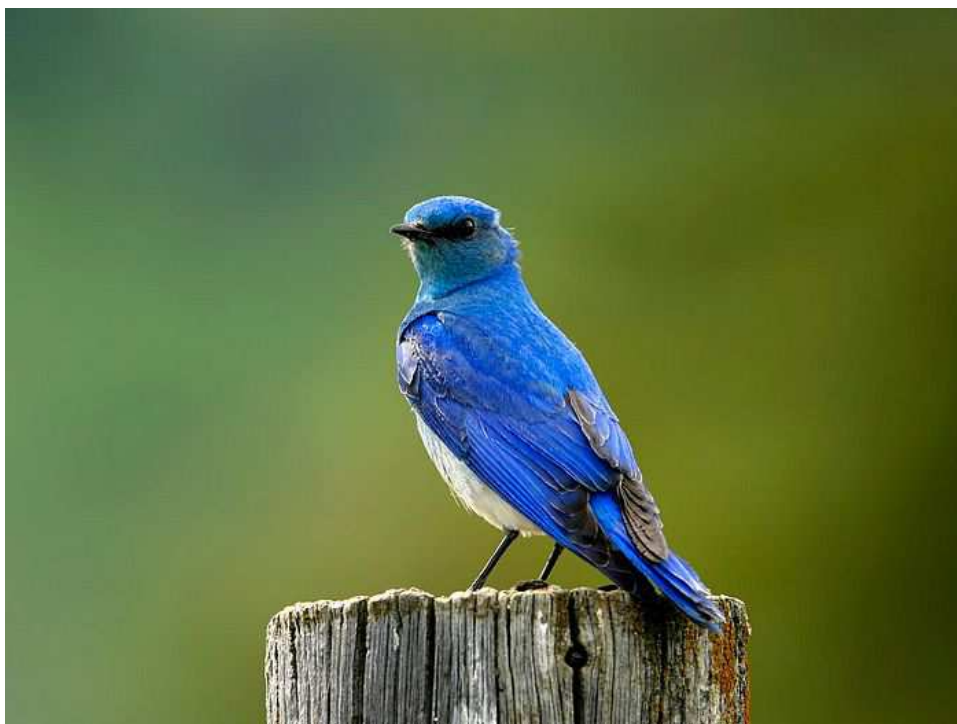

Figure 29: The destination image.

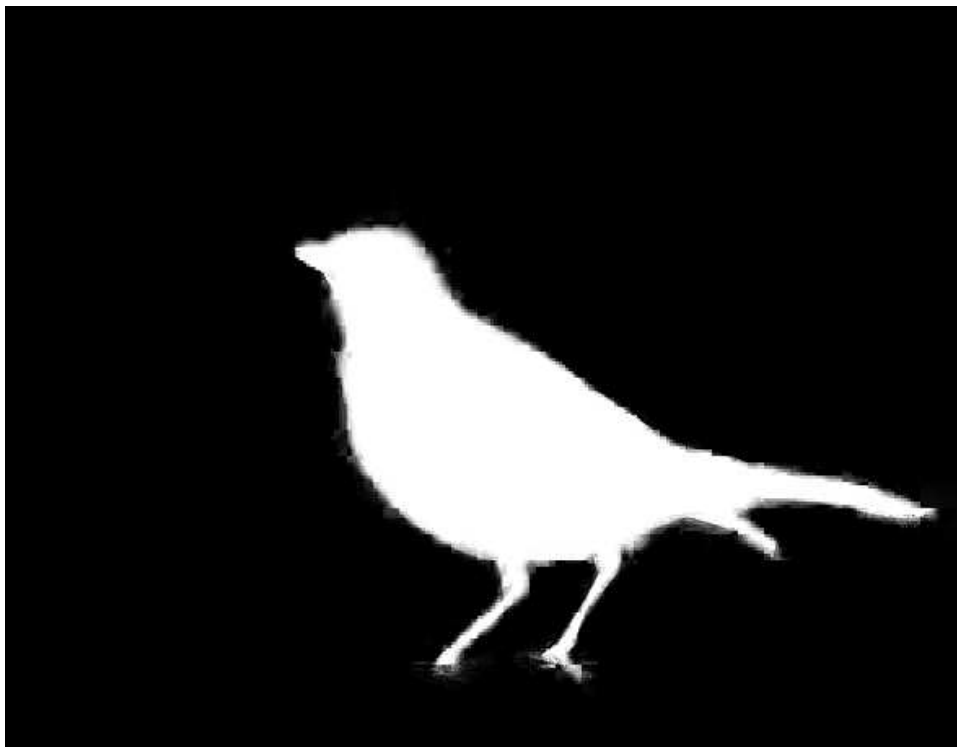

Figure 30: An alpha matte of the object.

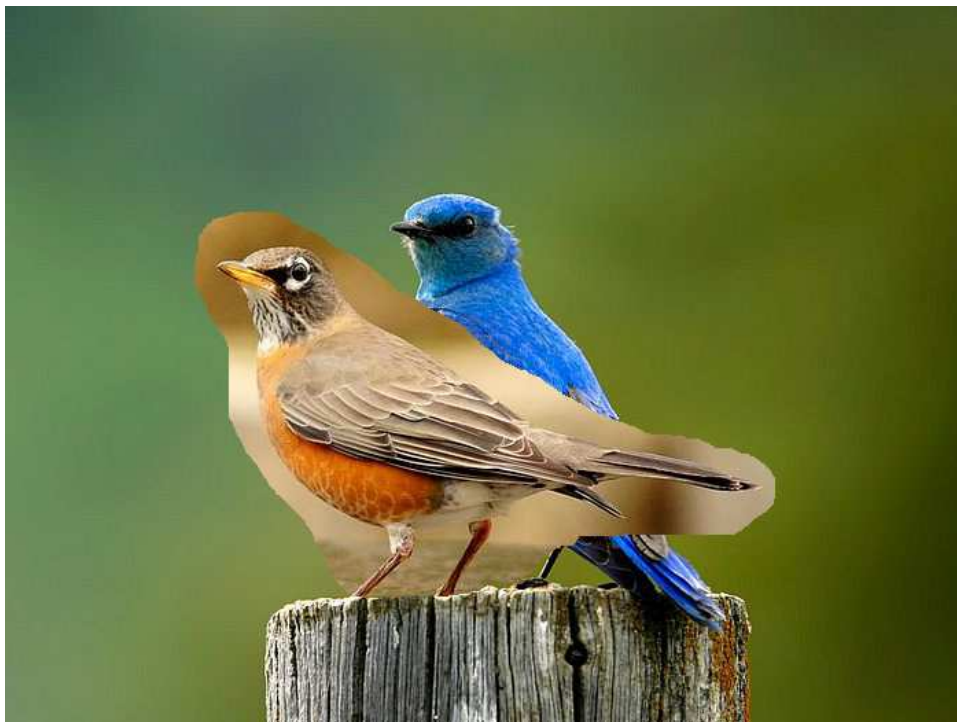

Figure 31: The result of direct cutting and pasting.

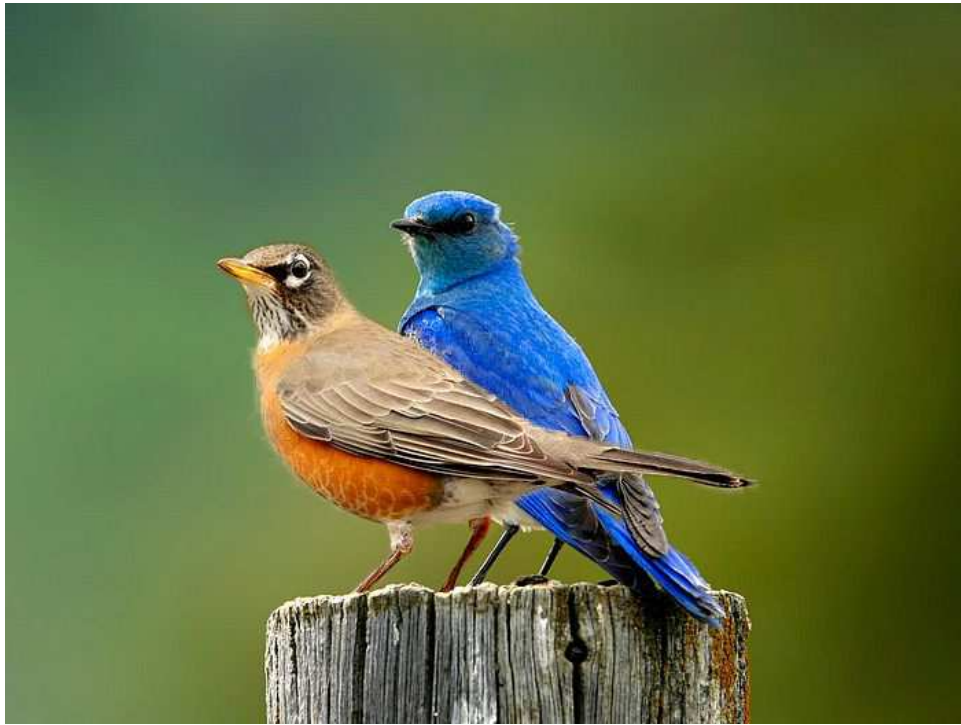

Figure 32: The result of alpha blending.

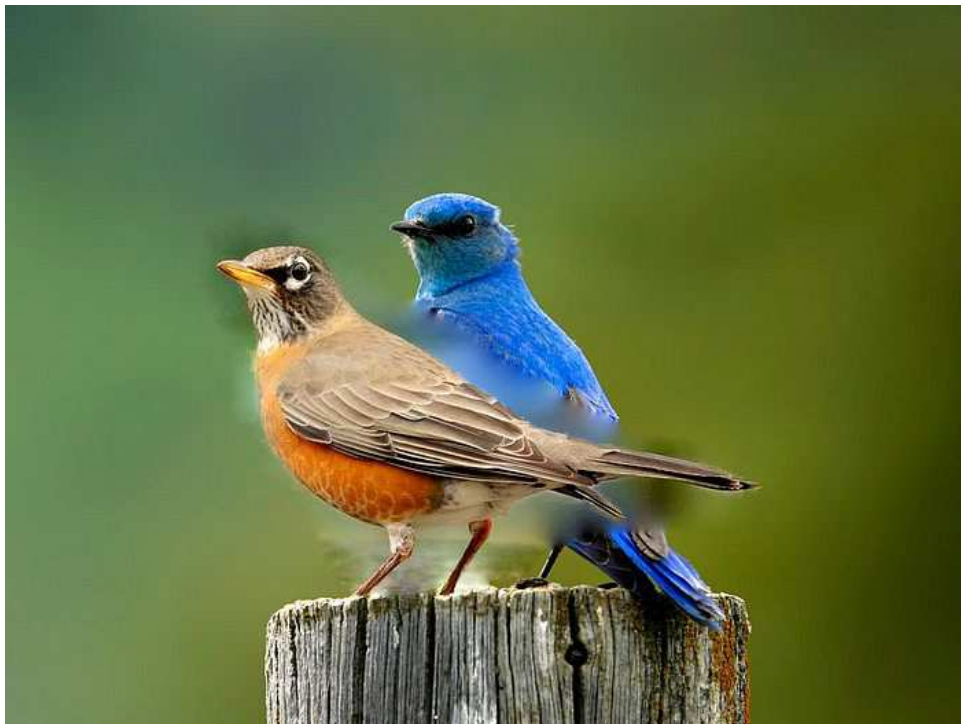

Figure 33: The result of Ding et al.'s method.

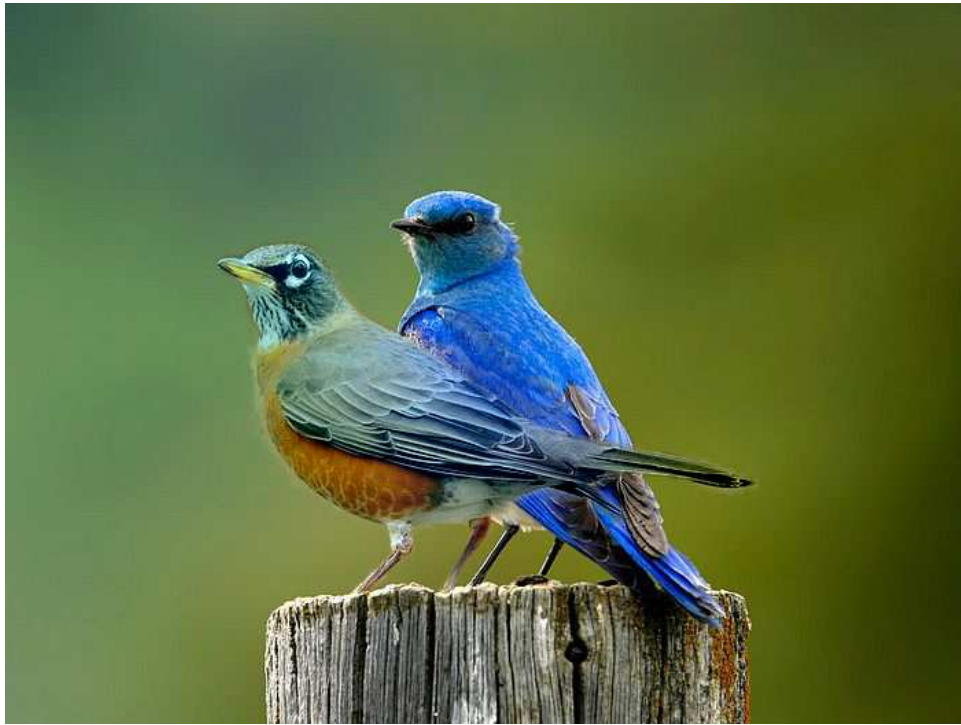

Figure 34: Mean value cloning followed by alpha blending.

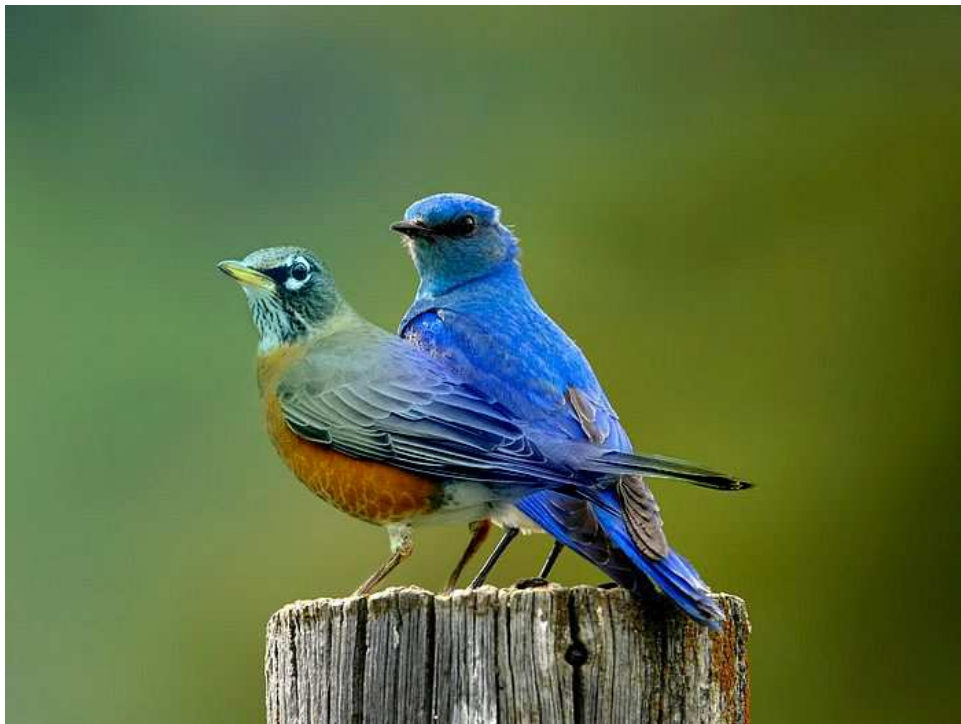

Figure 35: The result of Xie et al.'s method.

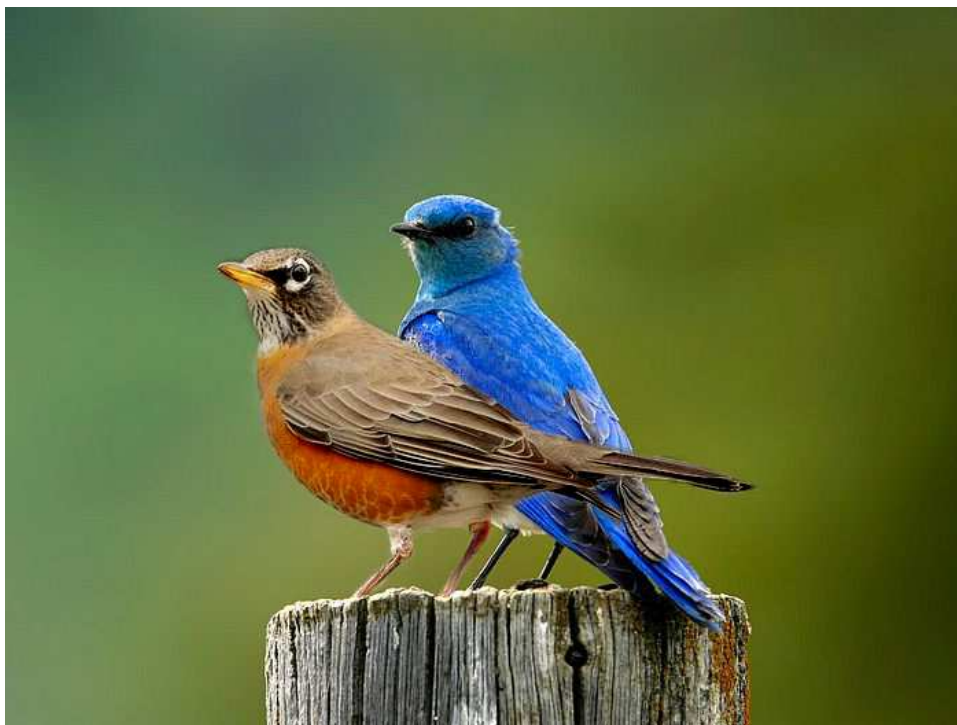

Figure 36: Our result.

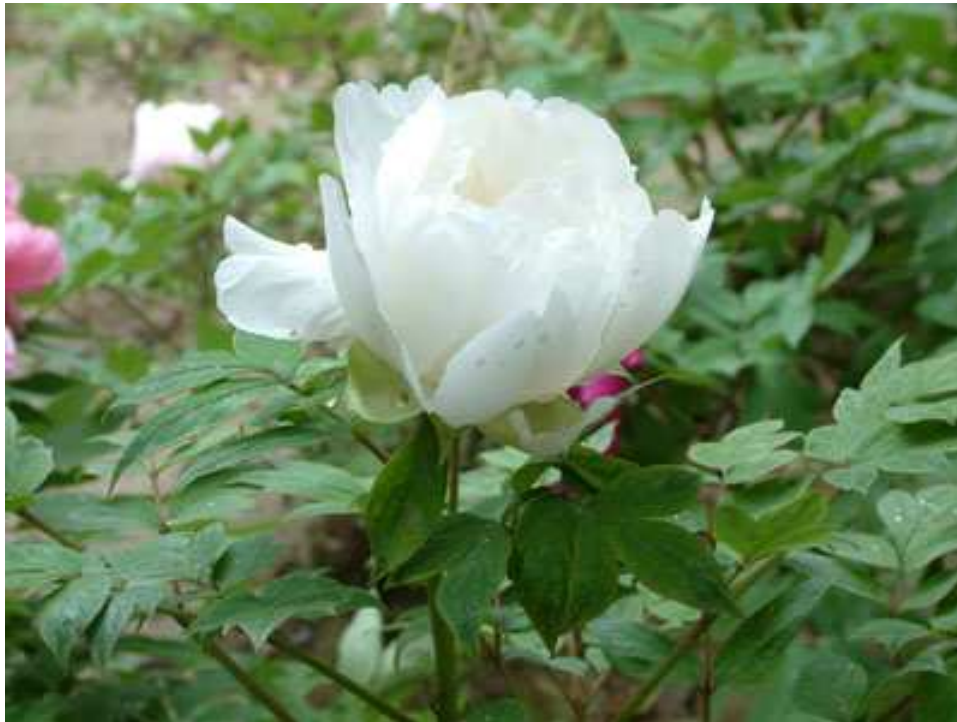

Figure 37: The source image.

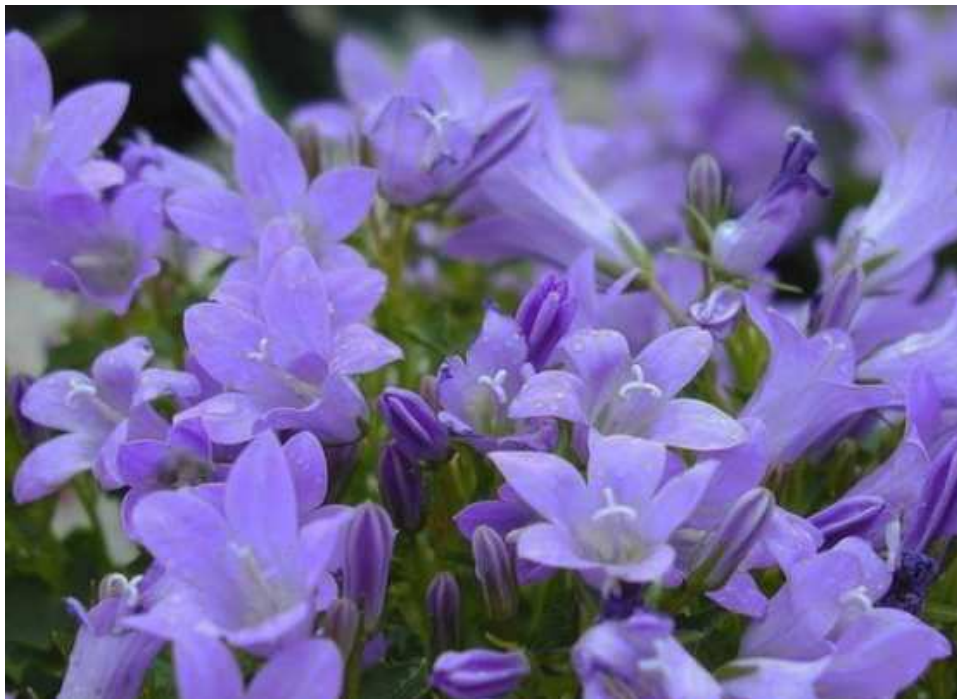

Figure 38: The destination image.

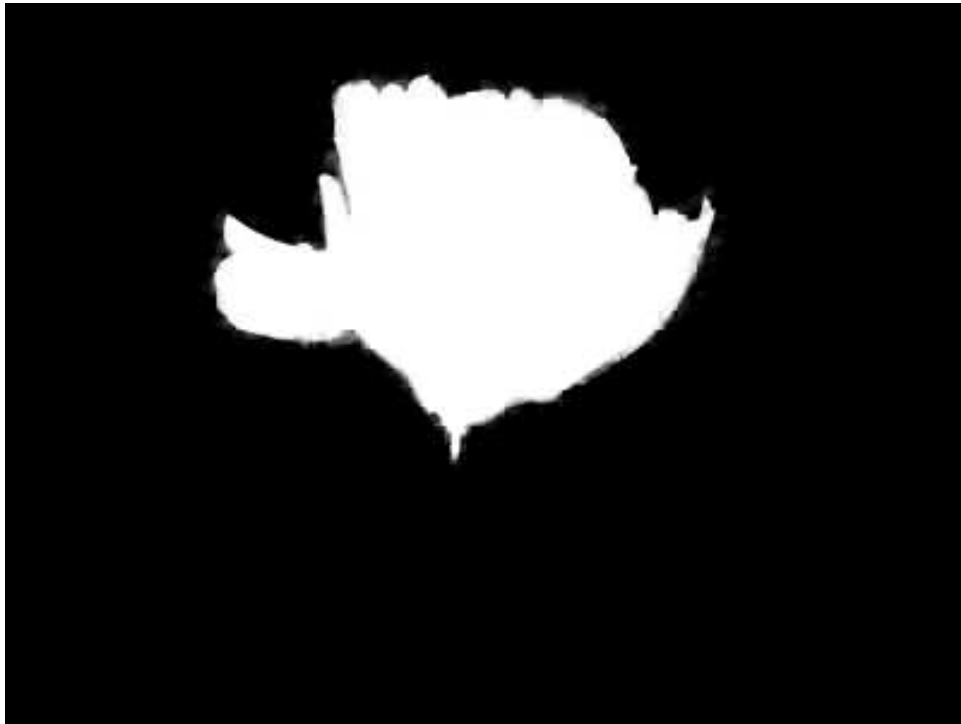

Figure 39: An alpha matte of the object.

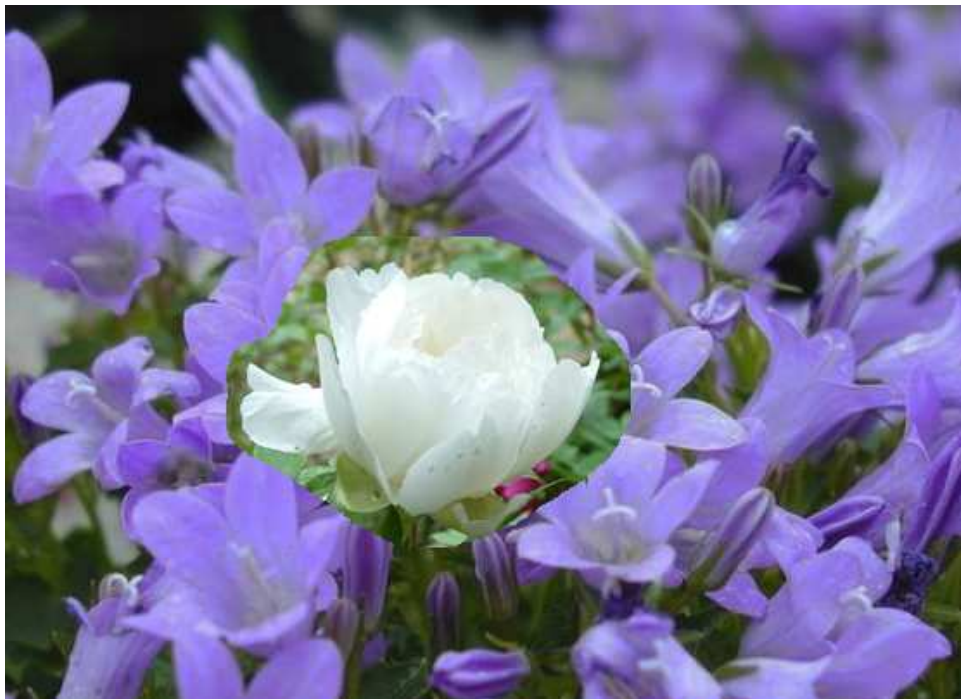

Figure 40: The result of direct cutting and pasting.

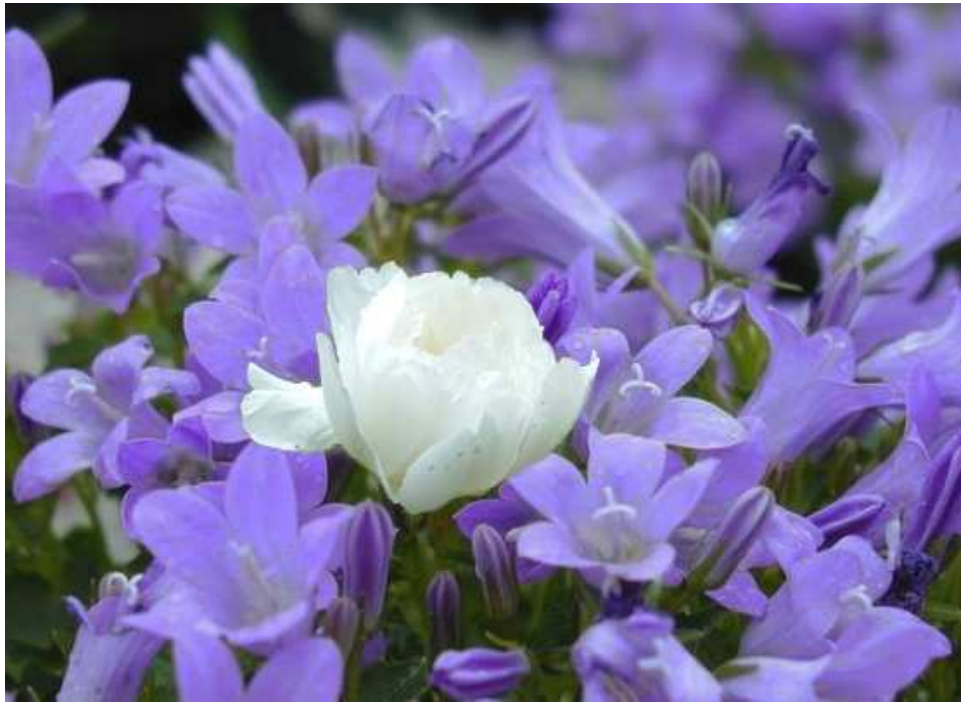

Figure 41: The result of alpha blending.

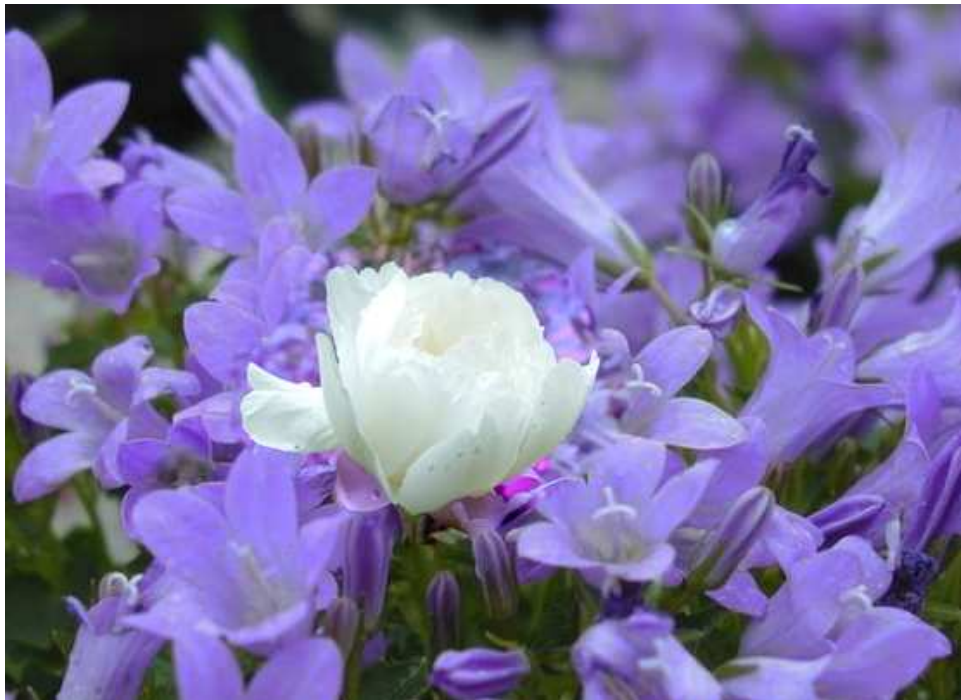

Figure 42: The result of Ding et al.'s method.



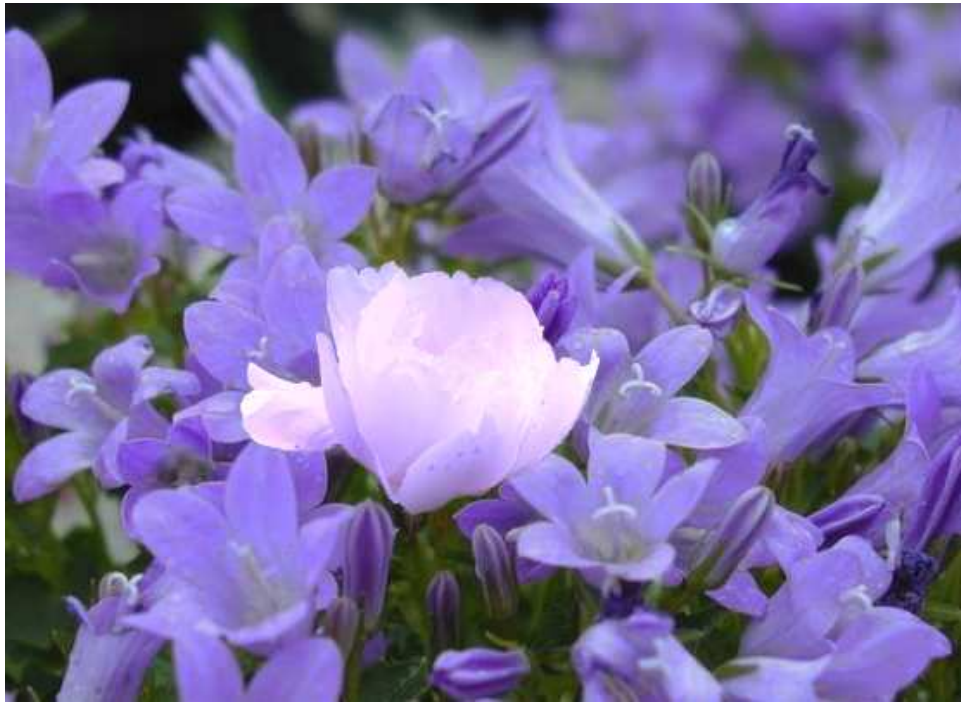

Figure 43: Mean value cloning followed by alpha blending.

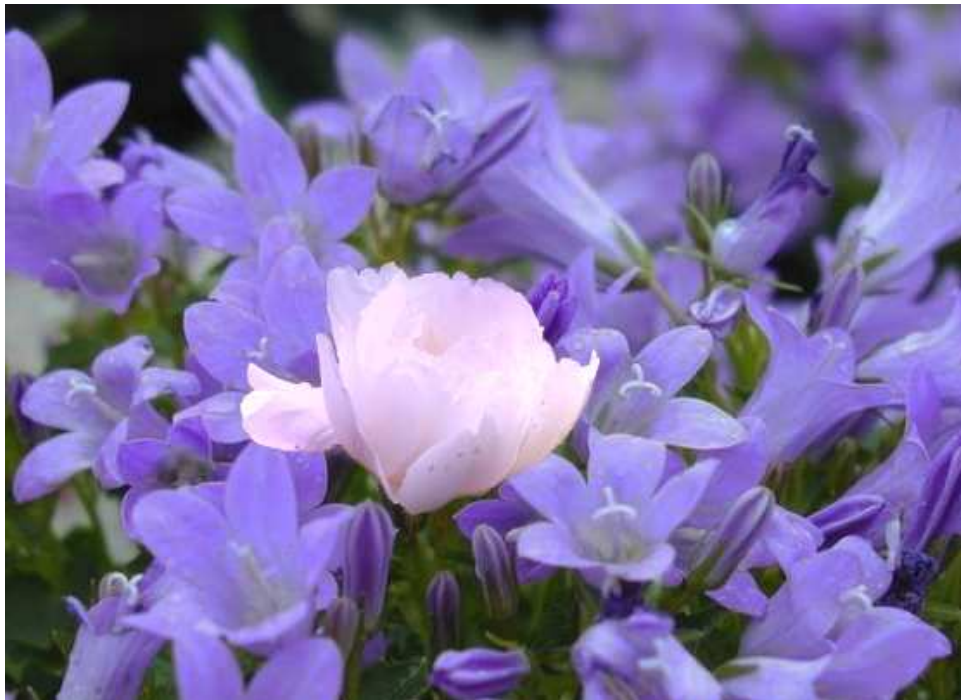

Figure 44: The result of Xie et al.'s method.

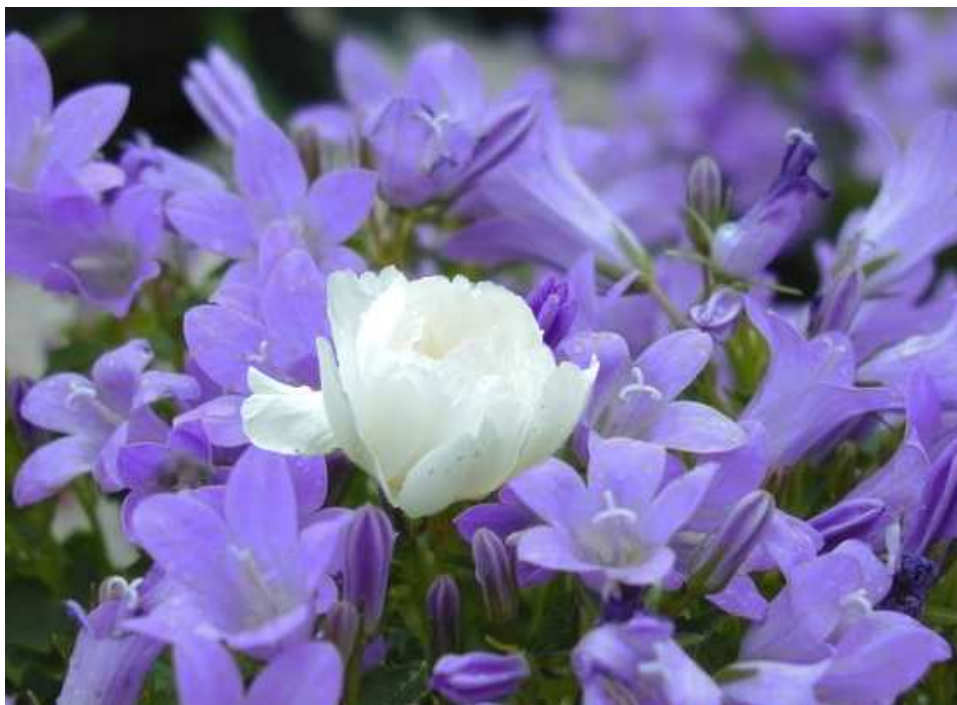

Figure 45: Our result.

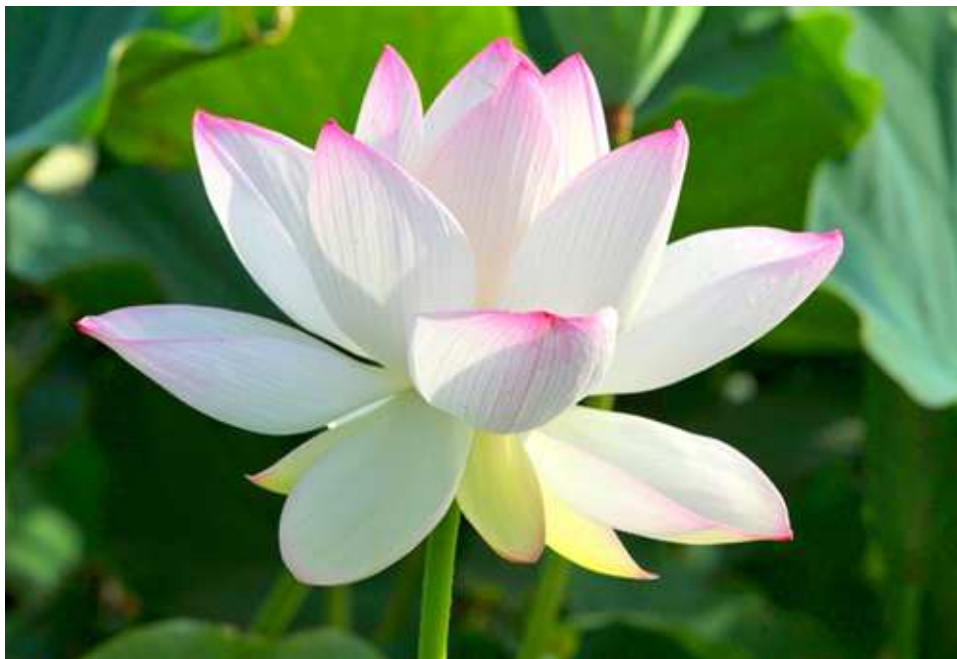

Figure 46: The source image.

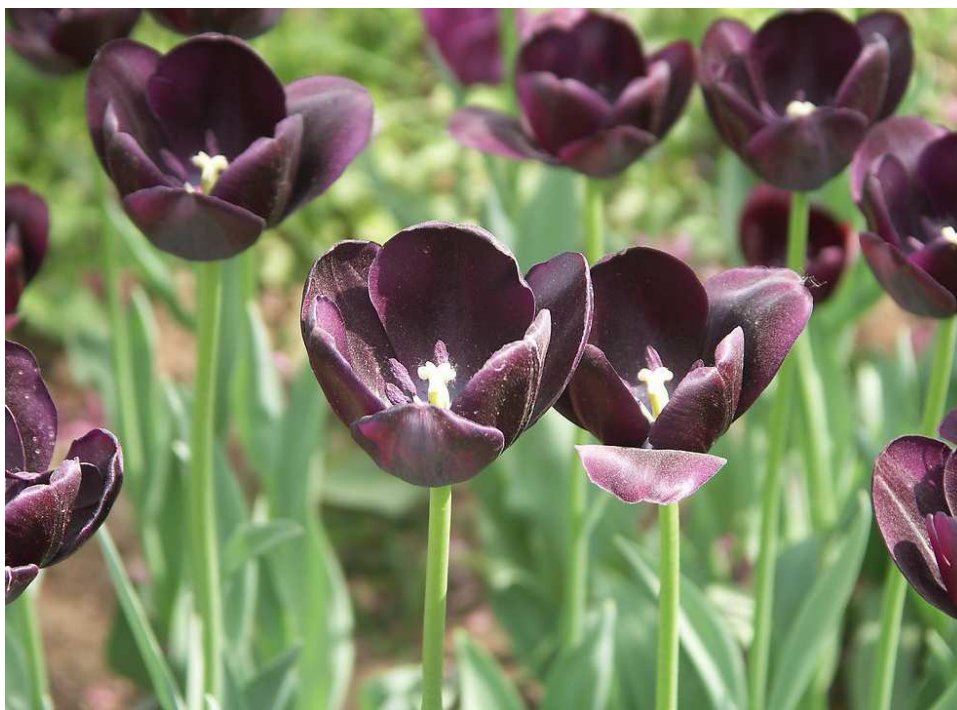

Figure 47: The destination image.

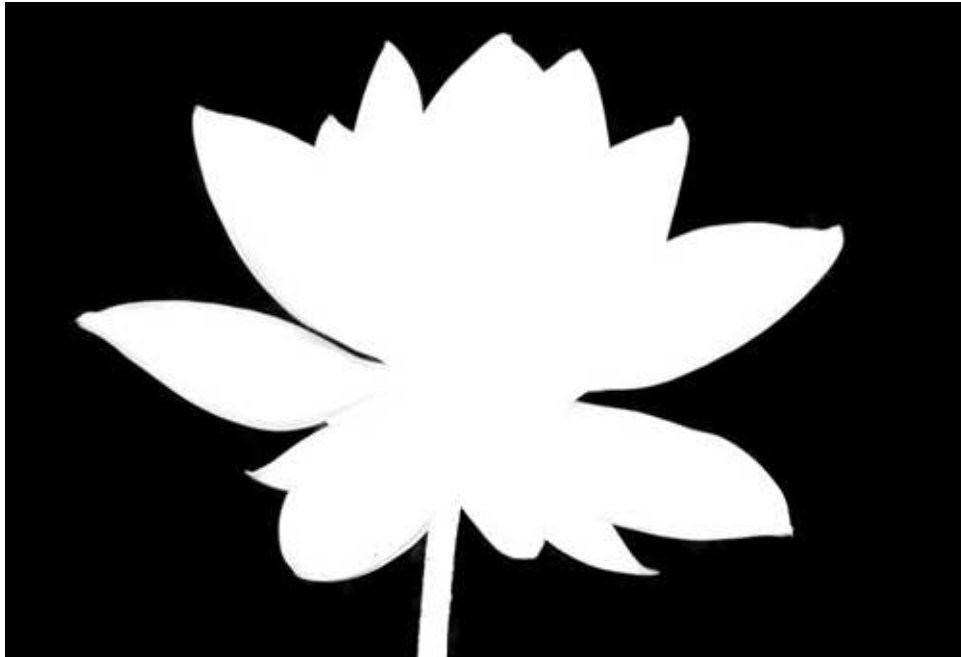

Figure 48: An alpha matte of the object.

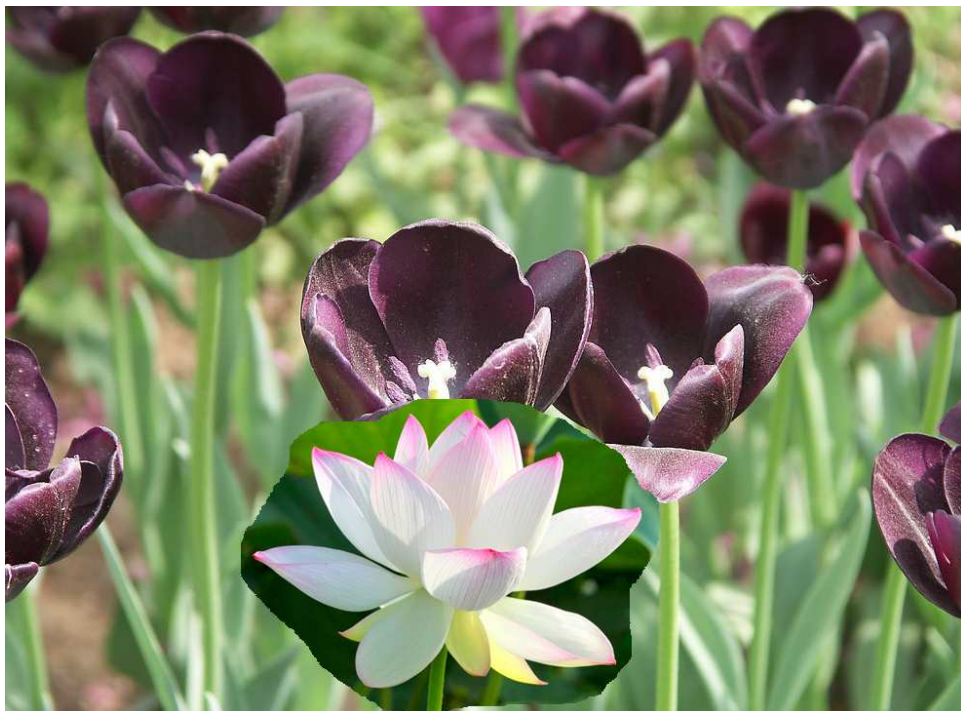

Figure 49: The result of direct cutting and pasting.

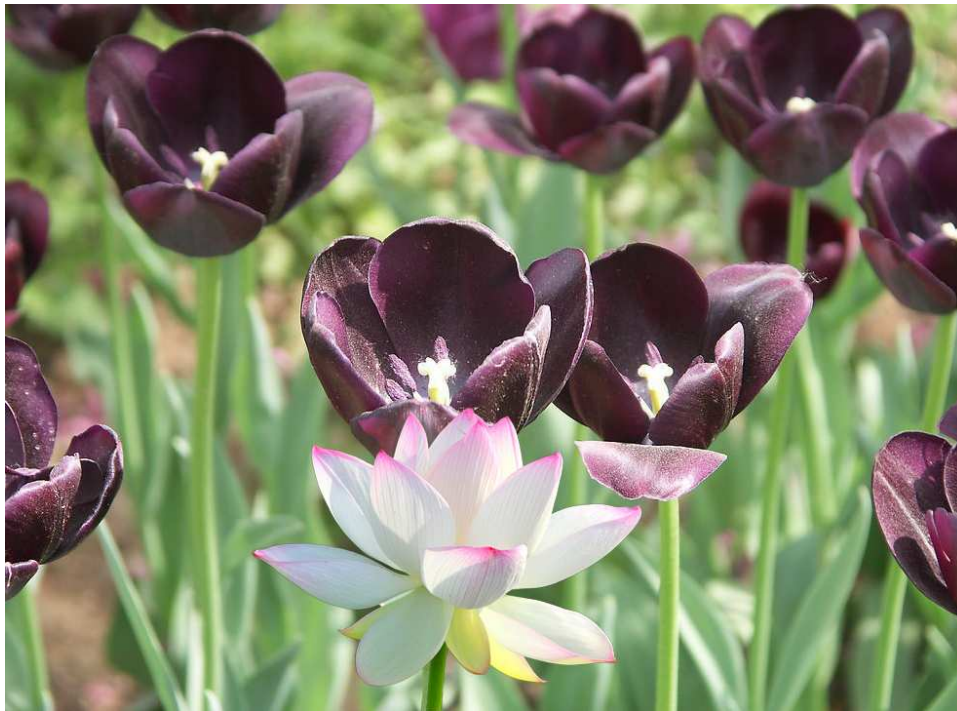

Figure 50: The result of alpha blending.

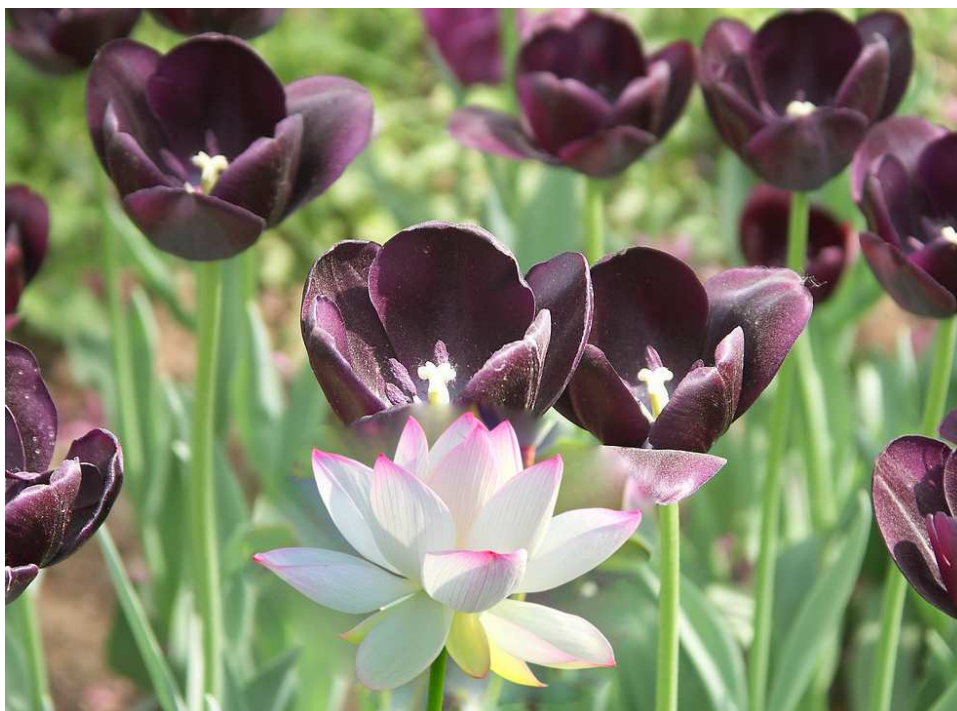

Figure 51: The result of Ding et al.'s method.

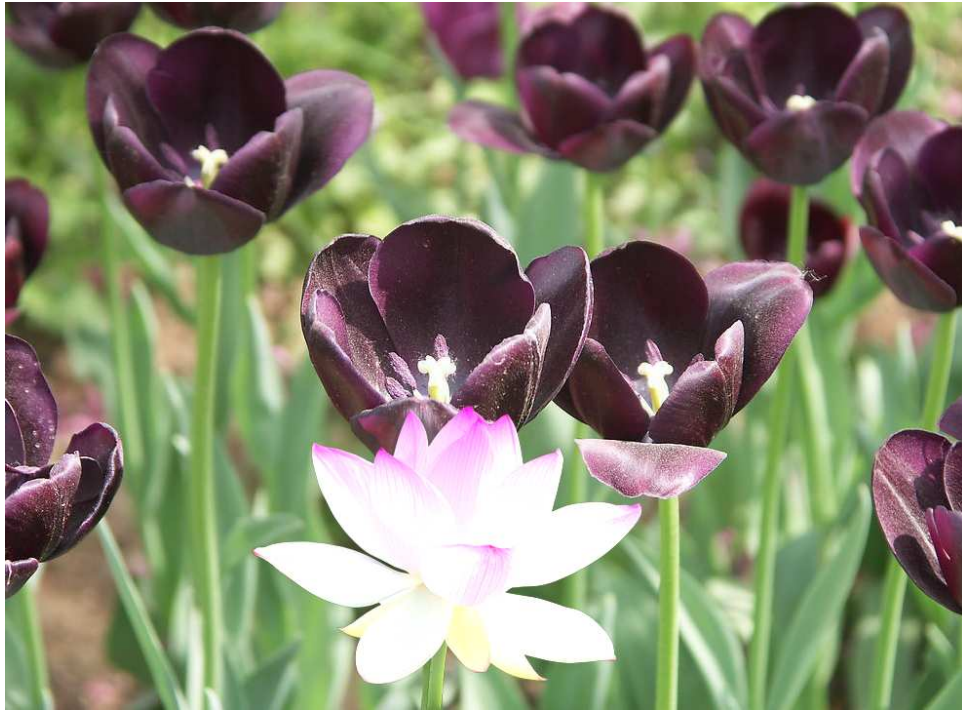

Figure 52: Mean value cloning followed by alpha blending.

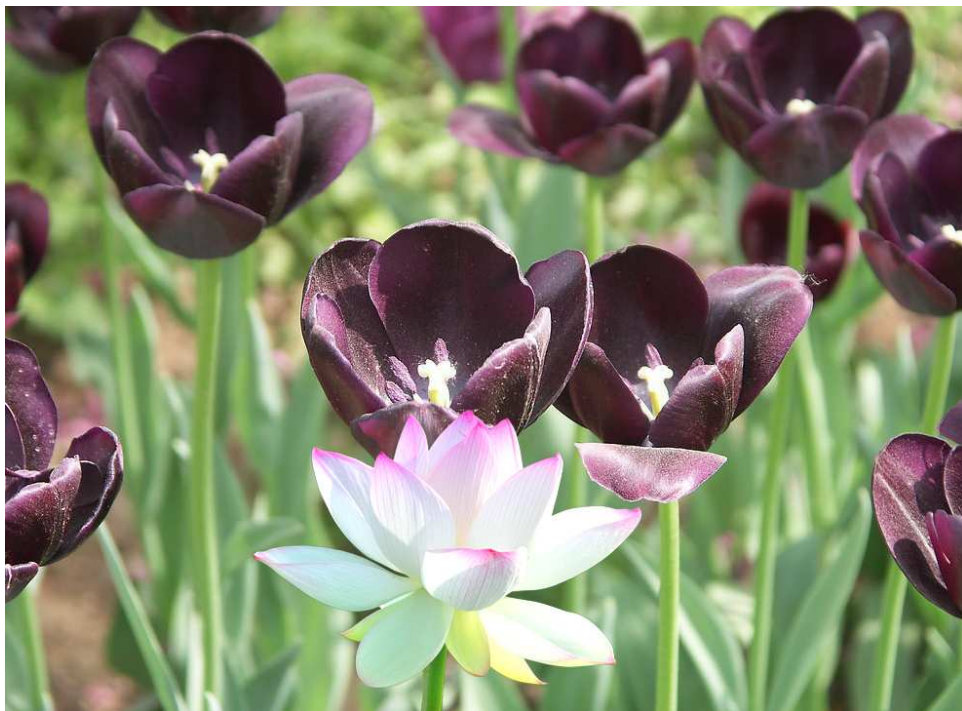

Figure 53: The result of Xie et al.'s method.

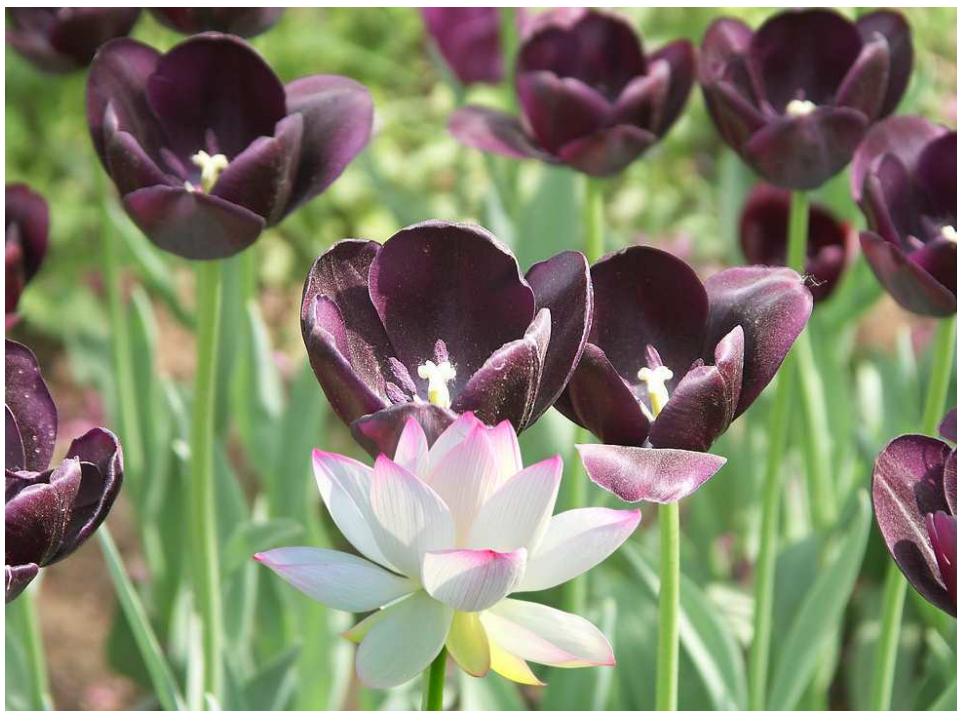

Figure 54: Our result.

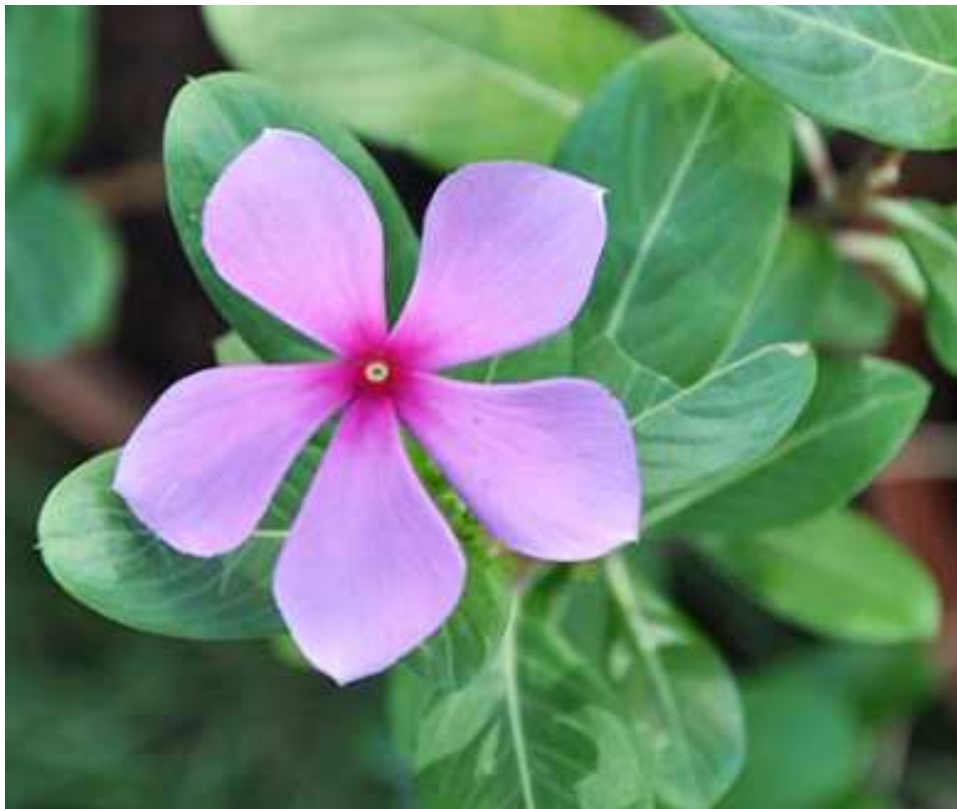

Figure 55: The source image.

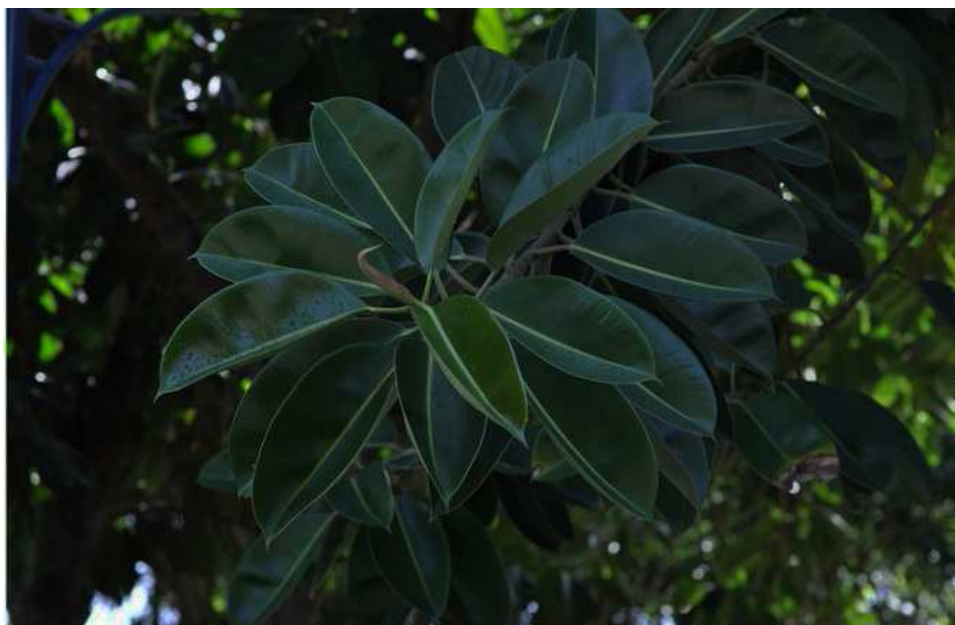

Figure 56: The destination image.



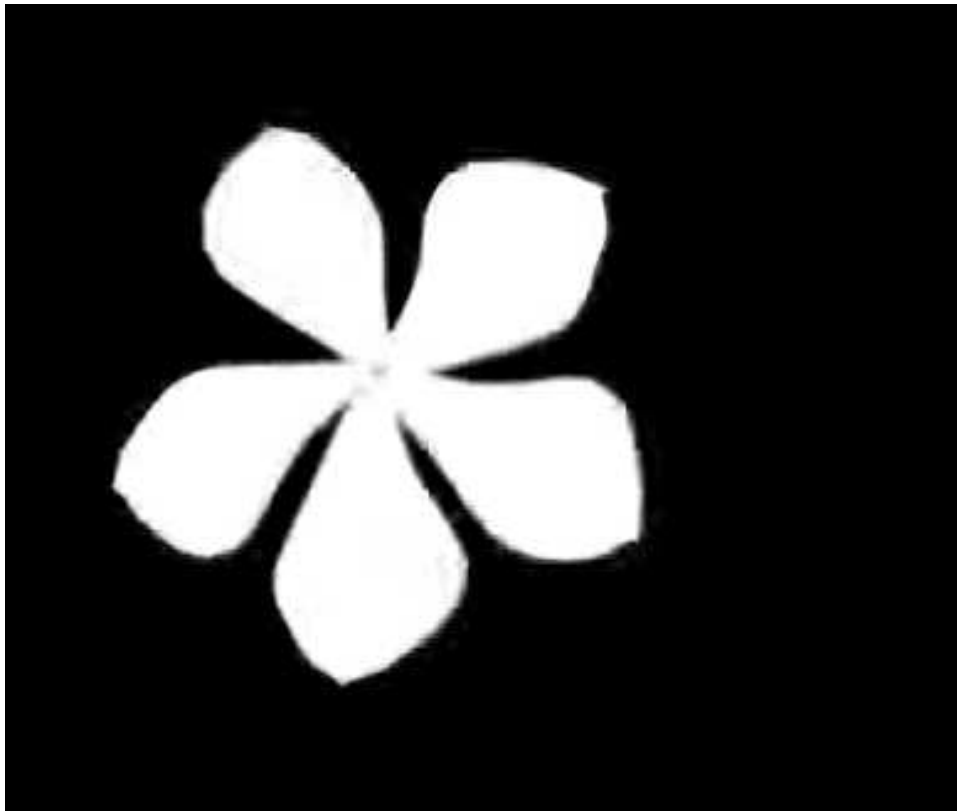

Figure 57: An alpha matte of the object.

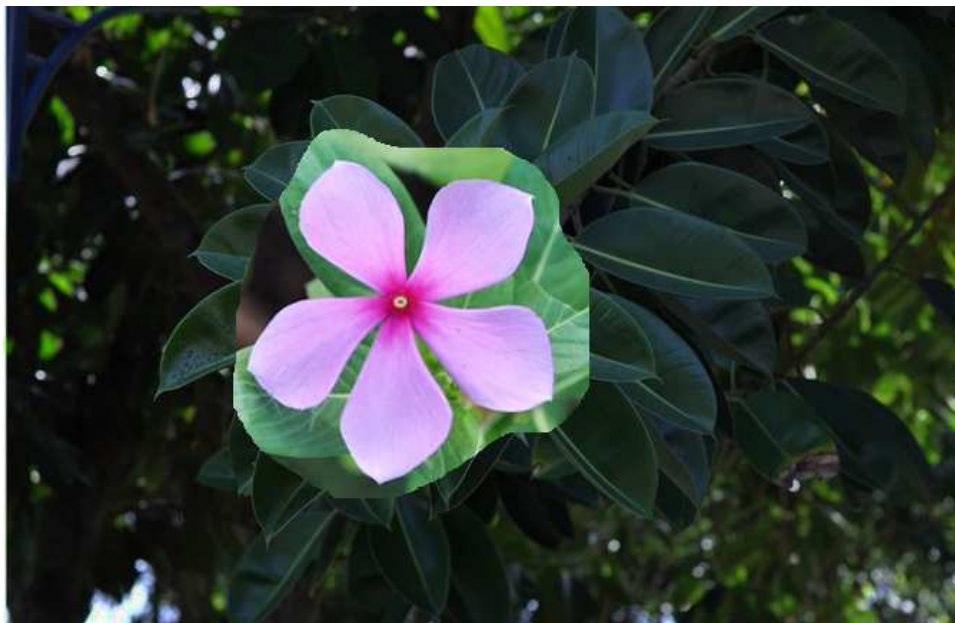

Figure 58: The result of direct cutting and pasting.

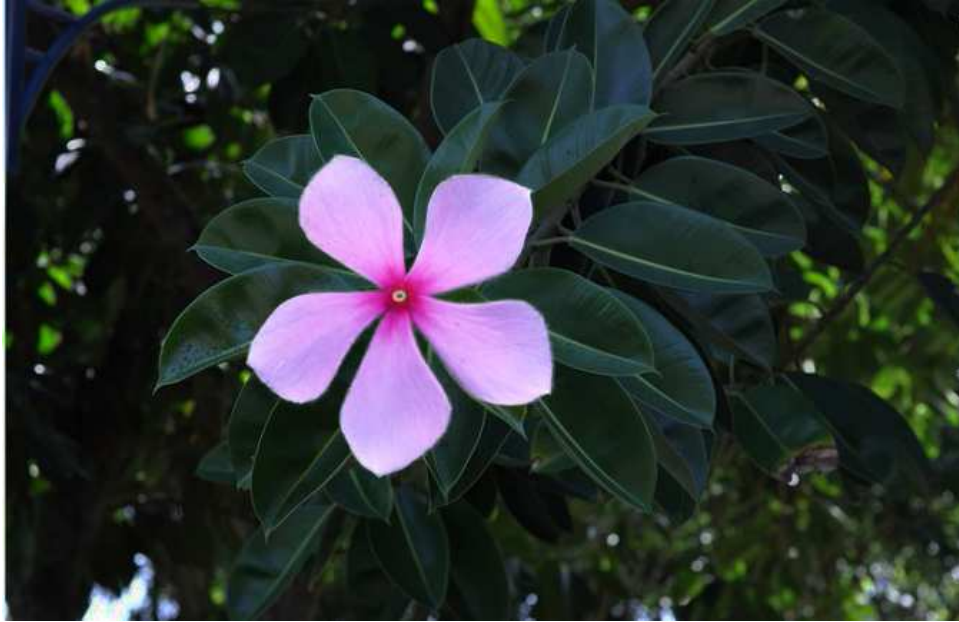

Figure 59: The result of alpha blending.

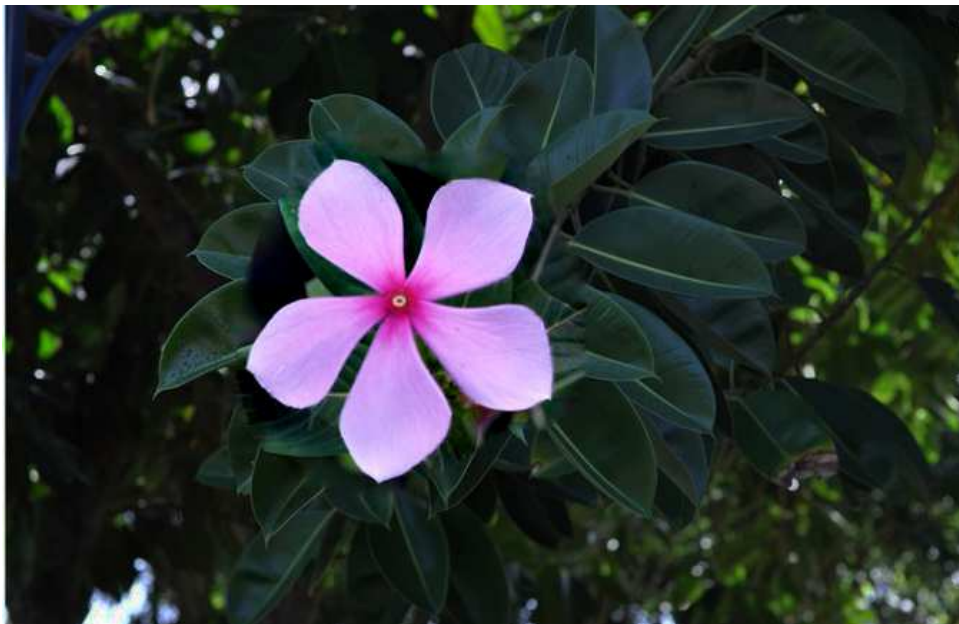

Figure 60: The result of Ding et al.'s method.

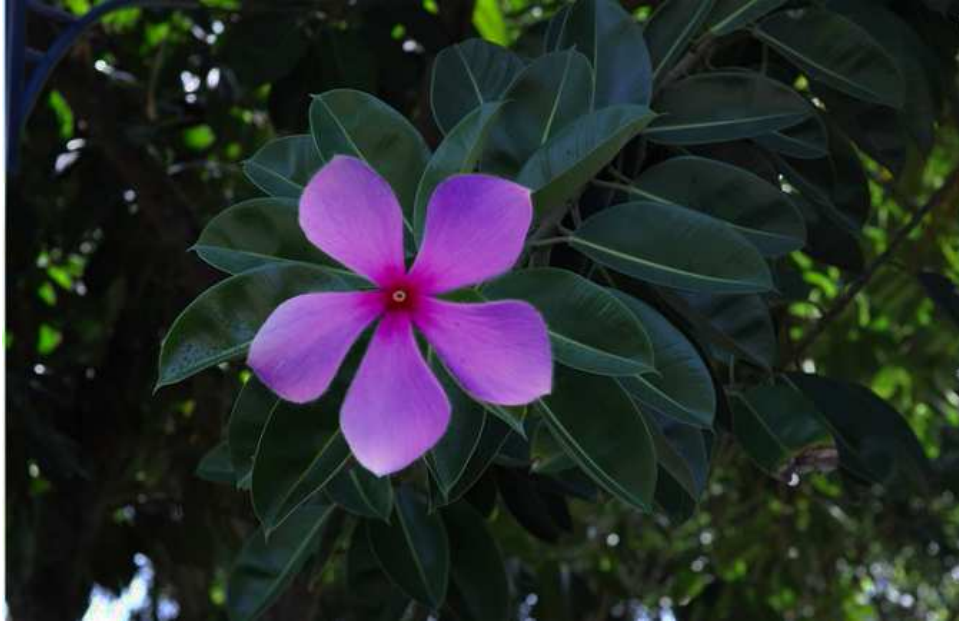

Figure 61: Mean value cloning followed by alpha blending.

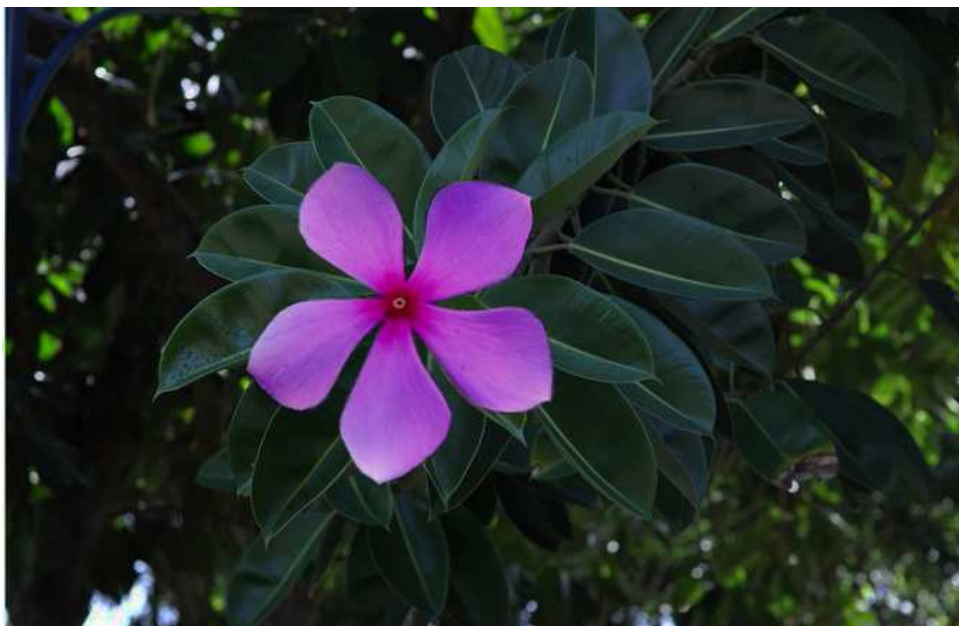

Figure 62: The result of Xie et al.'s method.

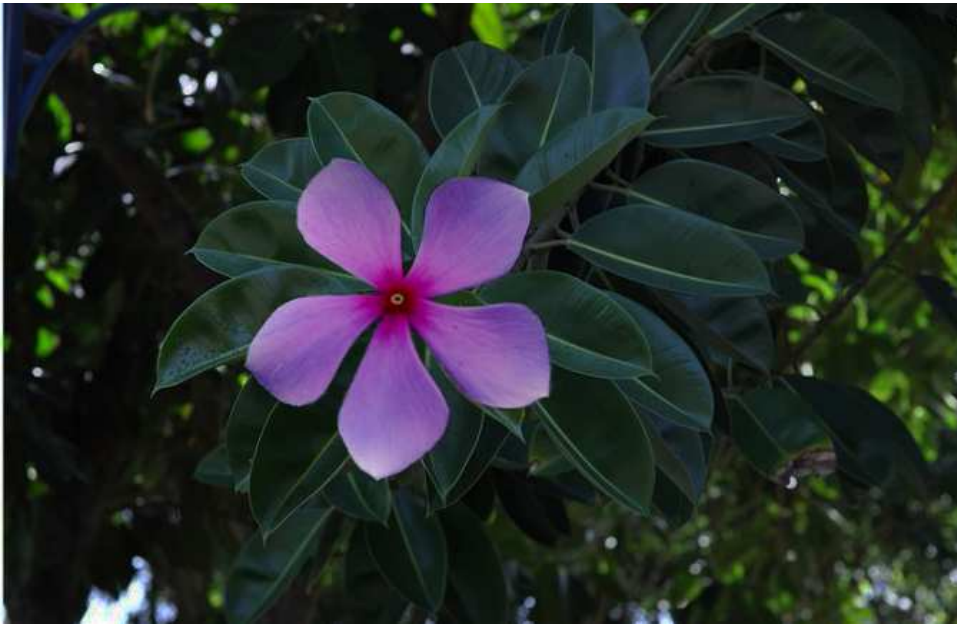

Figure 63: Our result.

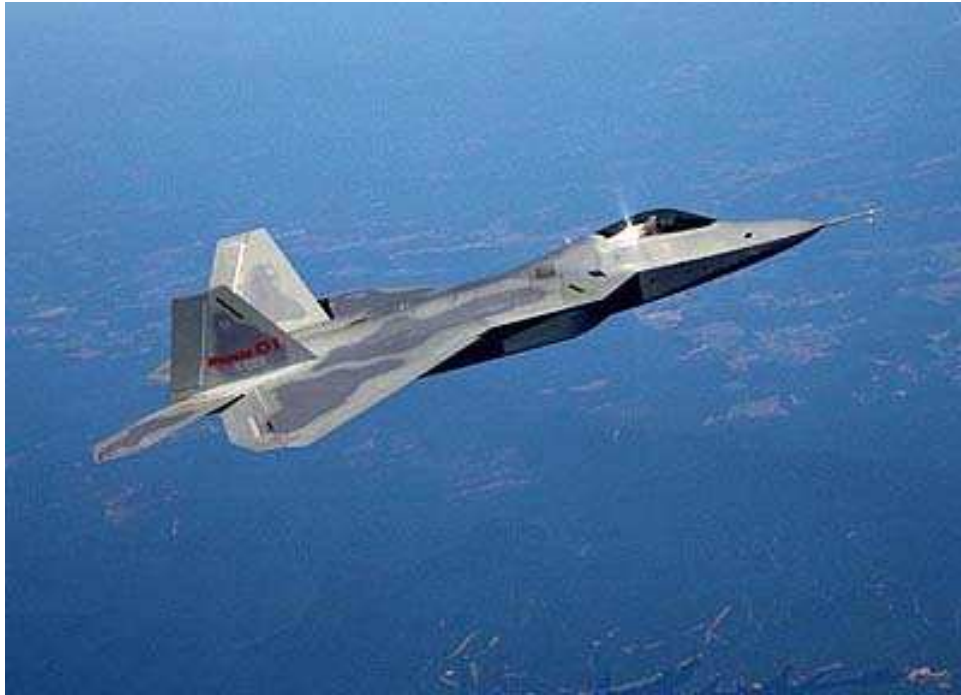

Figure 64: The source image.

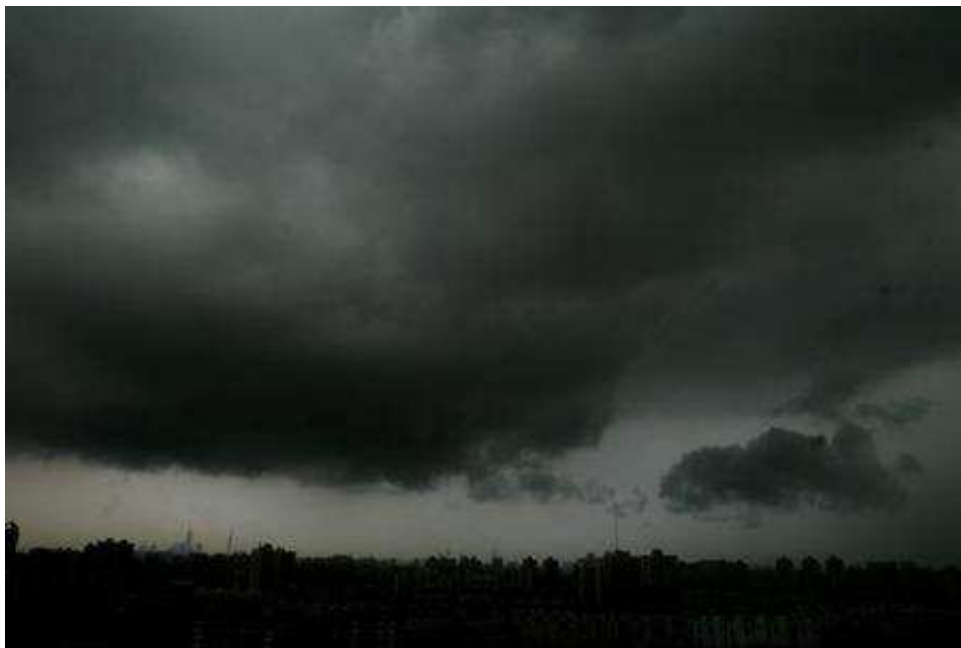

Figure 65: The destination image.

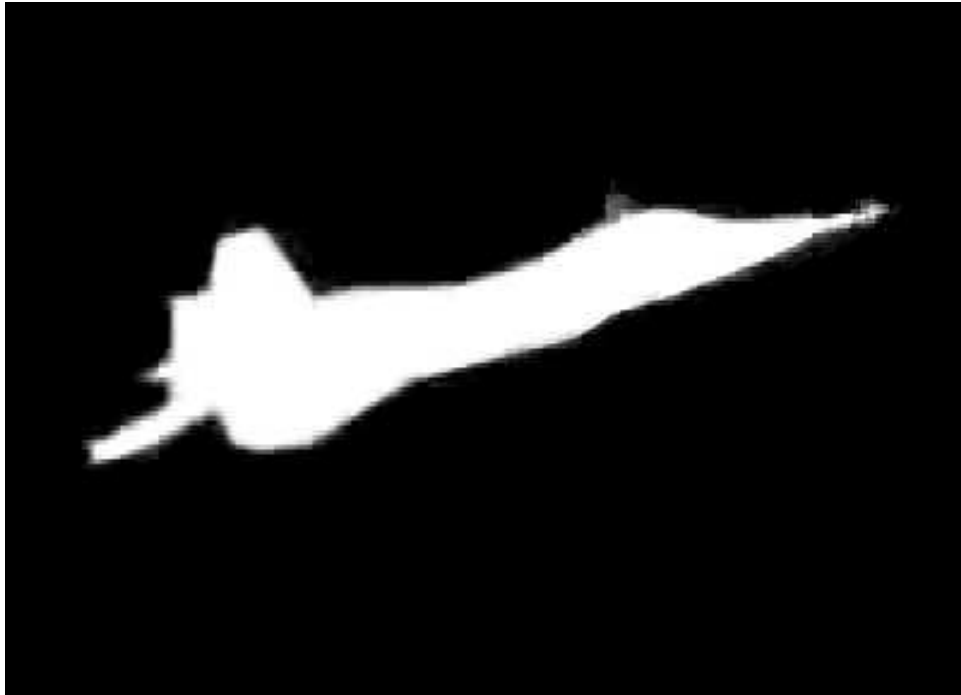

Figure 66: An alpha matte of the object.

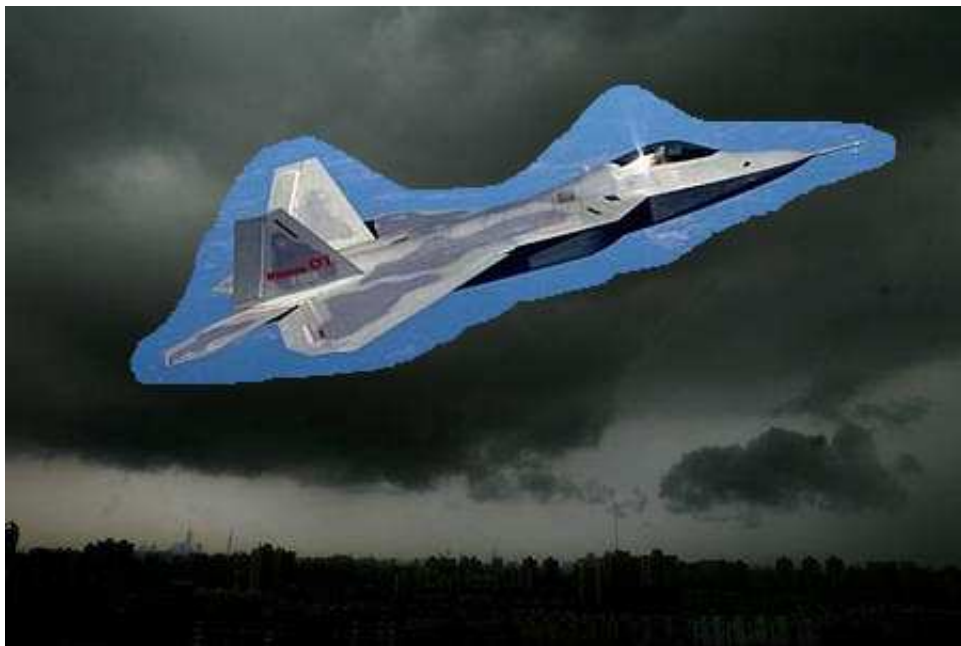

Figure 67: The result of direct cutting and pasting.

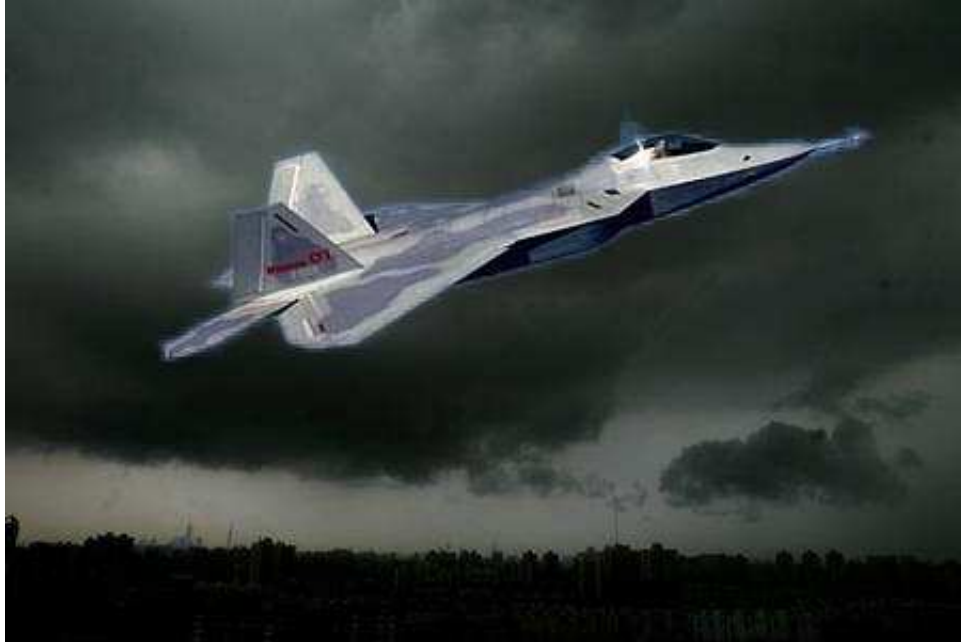

Figure 68: The result of alpha blending.

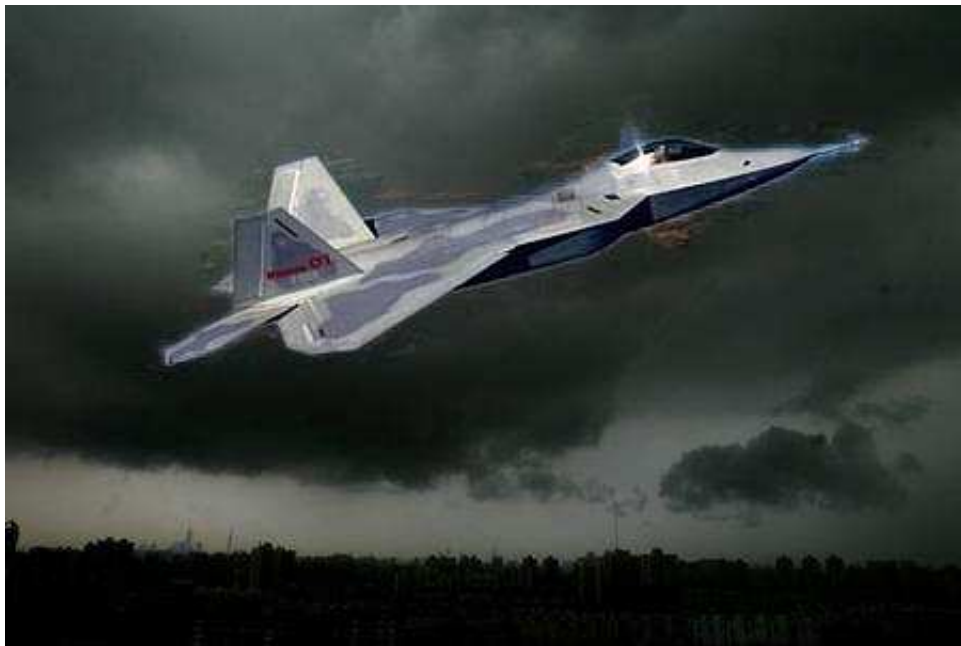

Figure 69: The result of Ding et al.'s method.

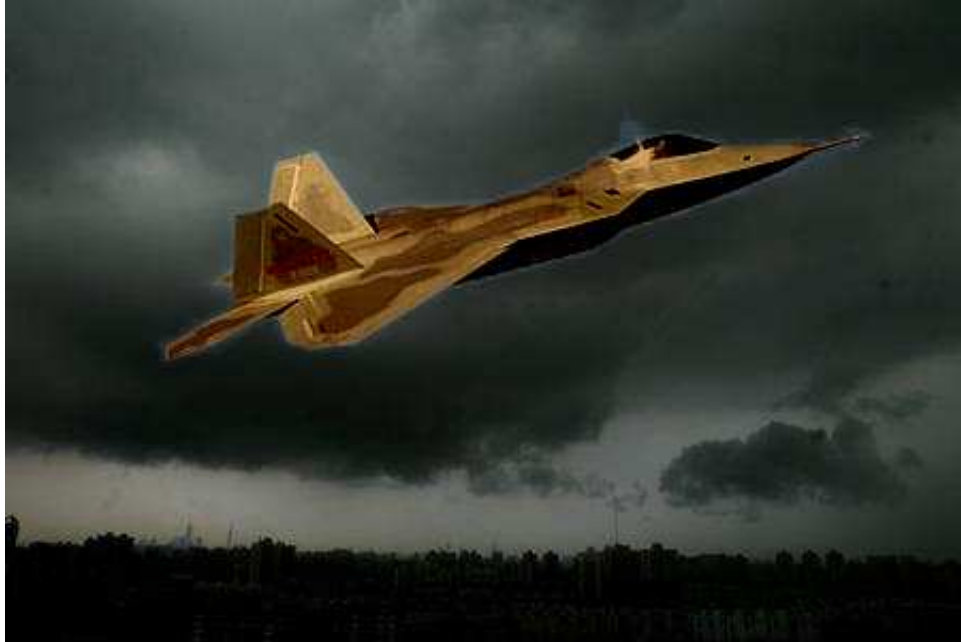

Figure 70: Mean value cloning followed by alpha blending.

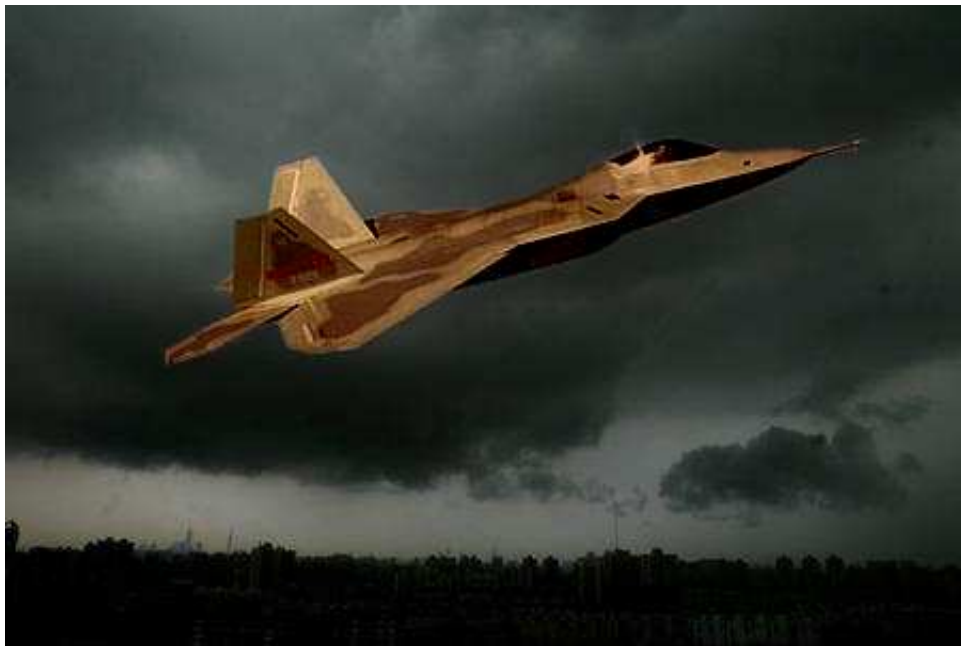

Figure 71: The result of Xie et al.'s method.



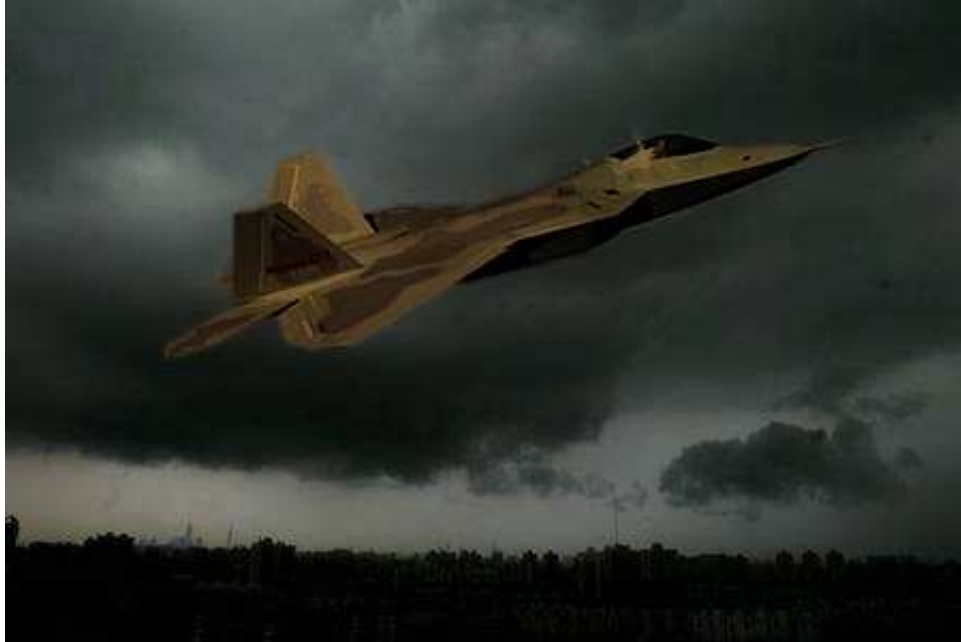

Figure 72: The result of Chen et al.'s method.

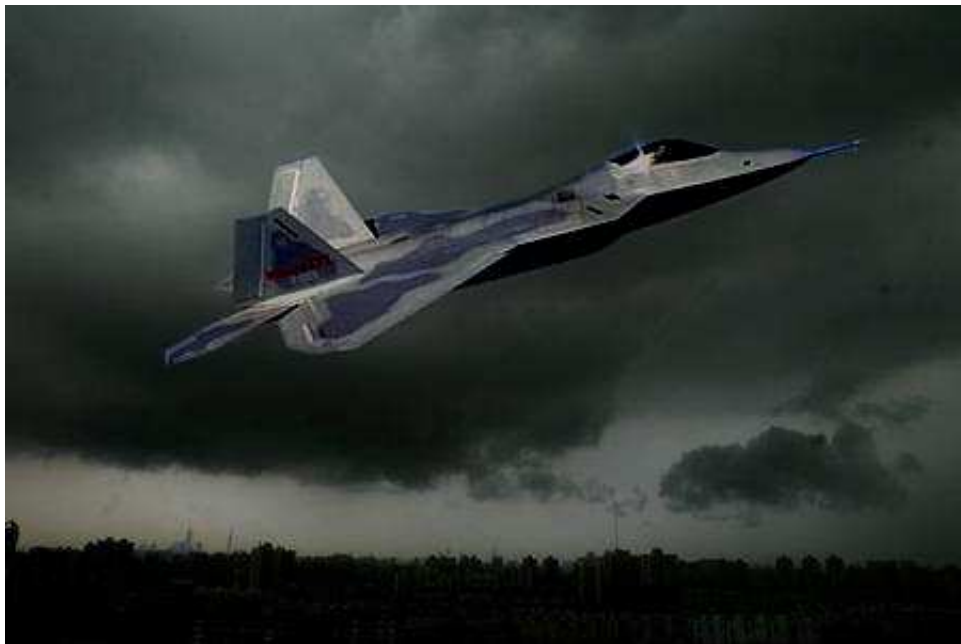

Figure 73: Our result.

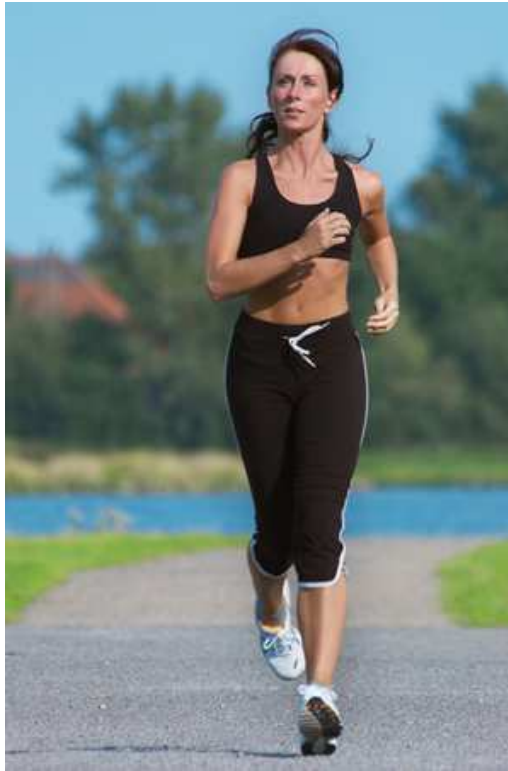

Figure 74: The source image.

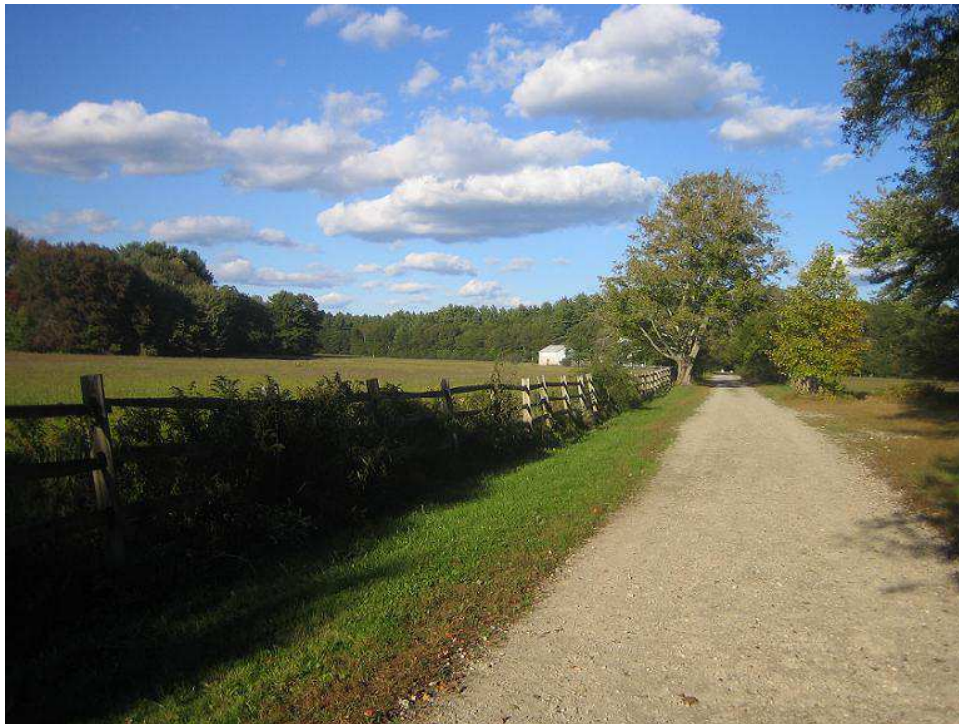

Figure 75: The destination image.

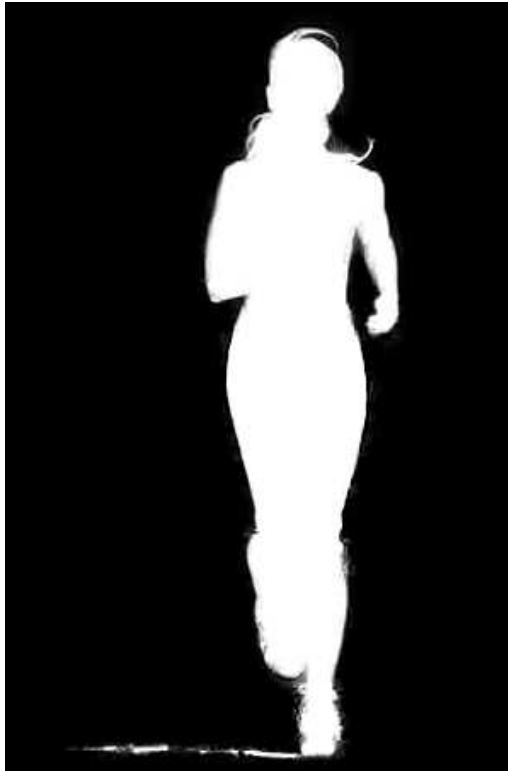

Figure 76: An alpha matte of the object.

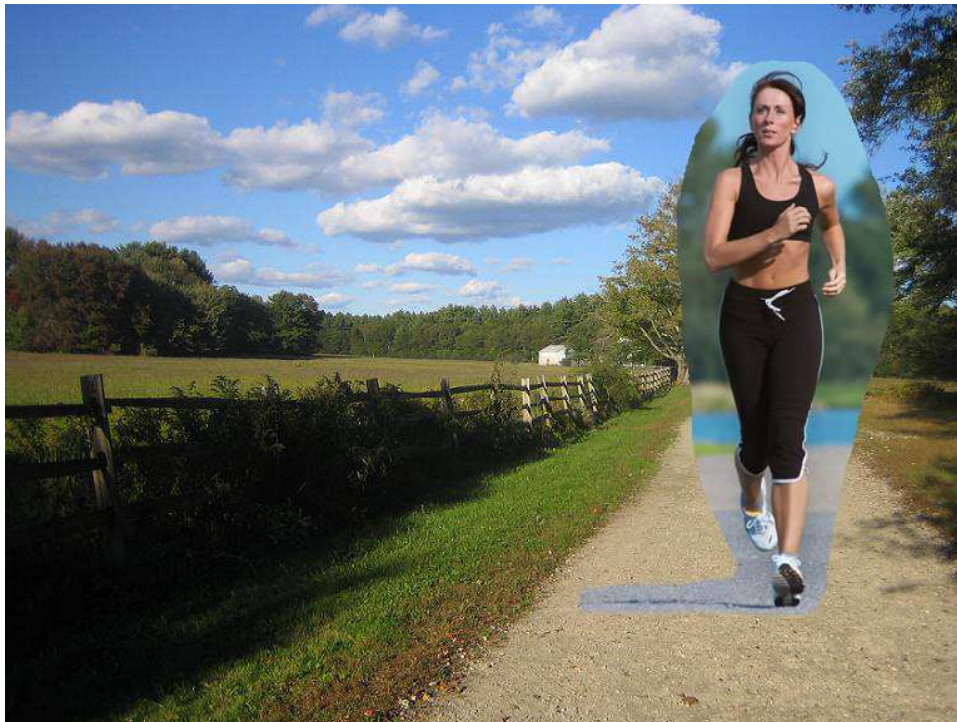

Figure 77: The result of direct cutting and pasting.

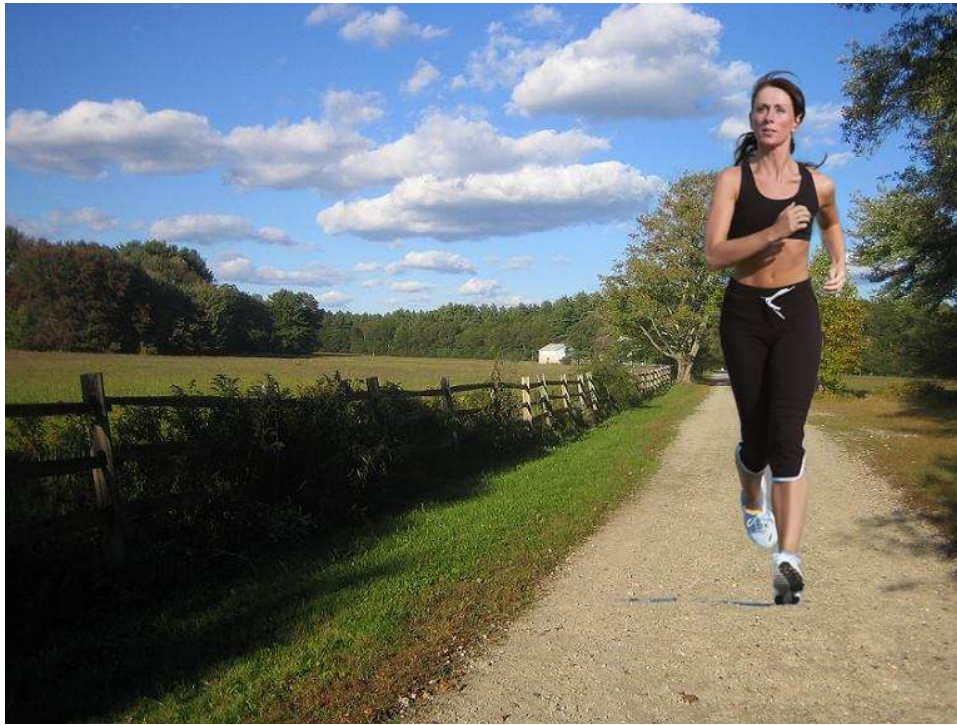

Figure 78: The result of alpha blending.

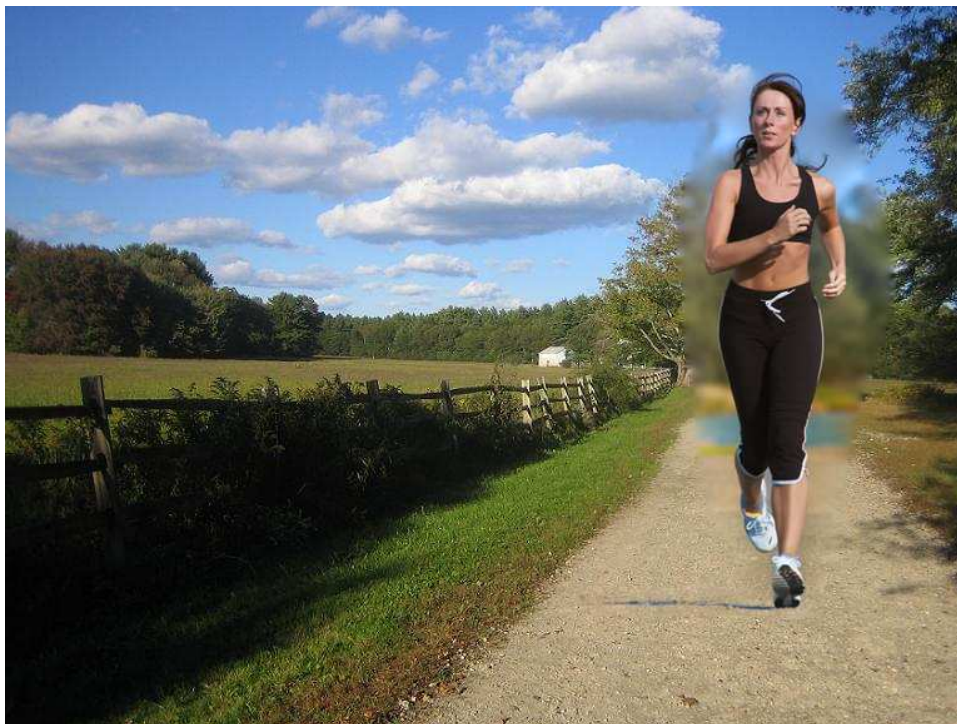

Figure 79: The result of Ding et al.'s method.

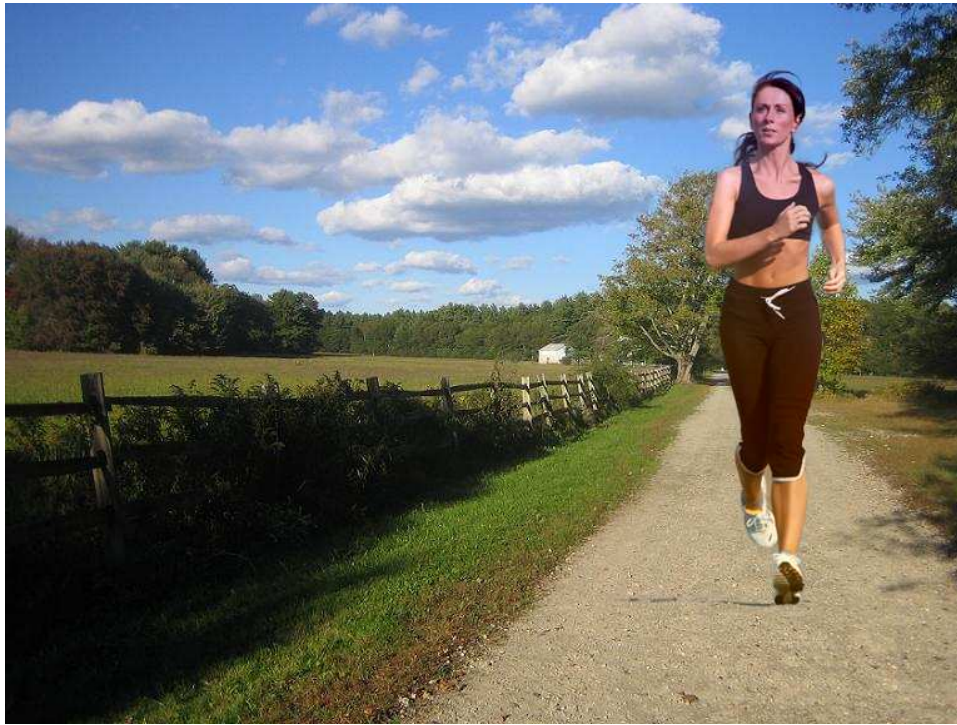

Figure 80: Mean value cloning followed by alpha blending.

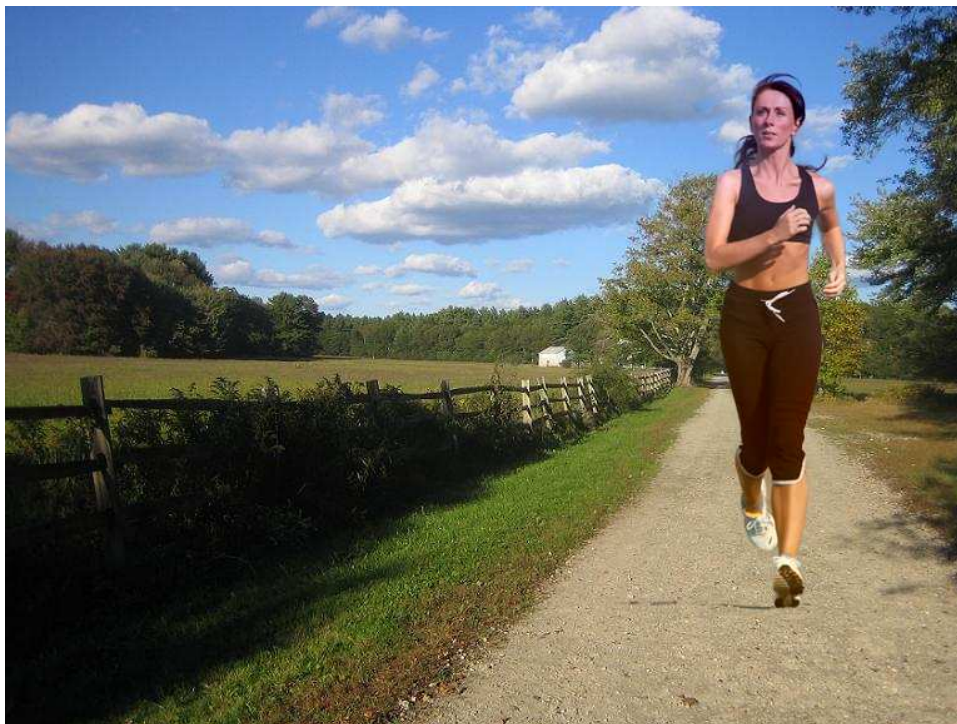

Figure 81: The result of Xie et al.'s method.

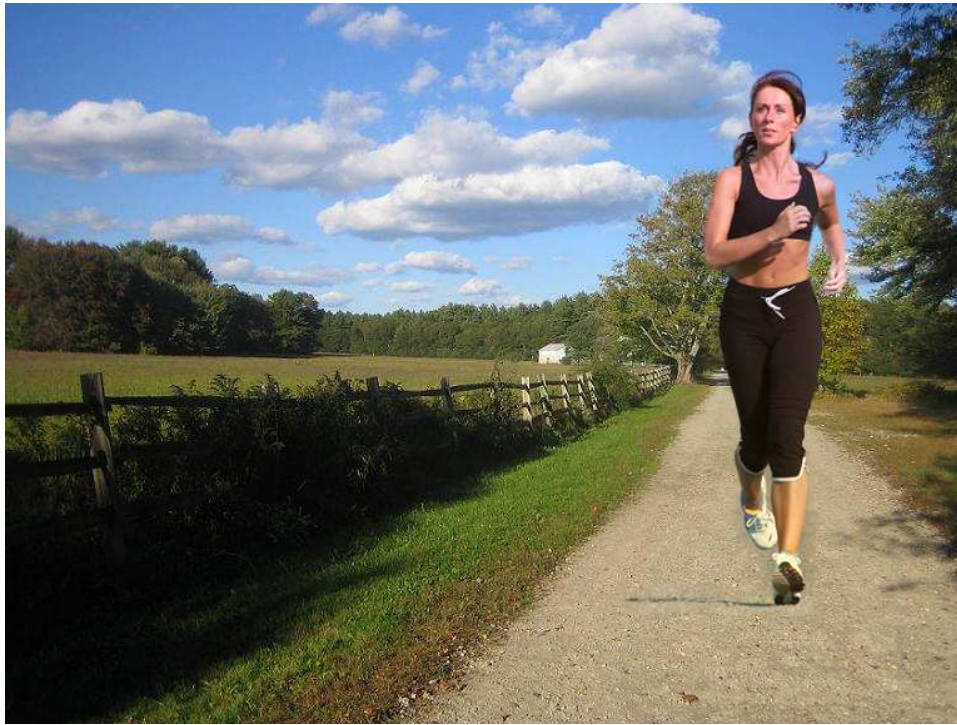

Figure 82: The result of Chen et al.'s method.

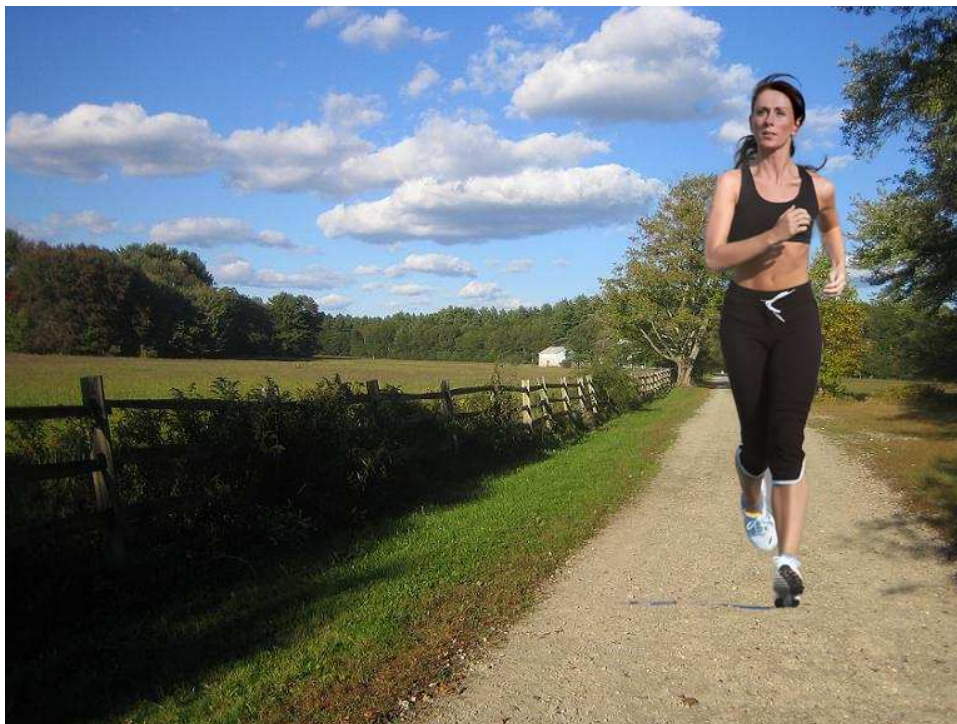

Figure 83: Our result.

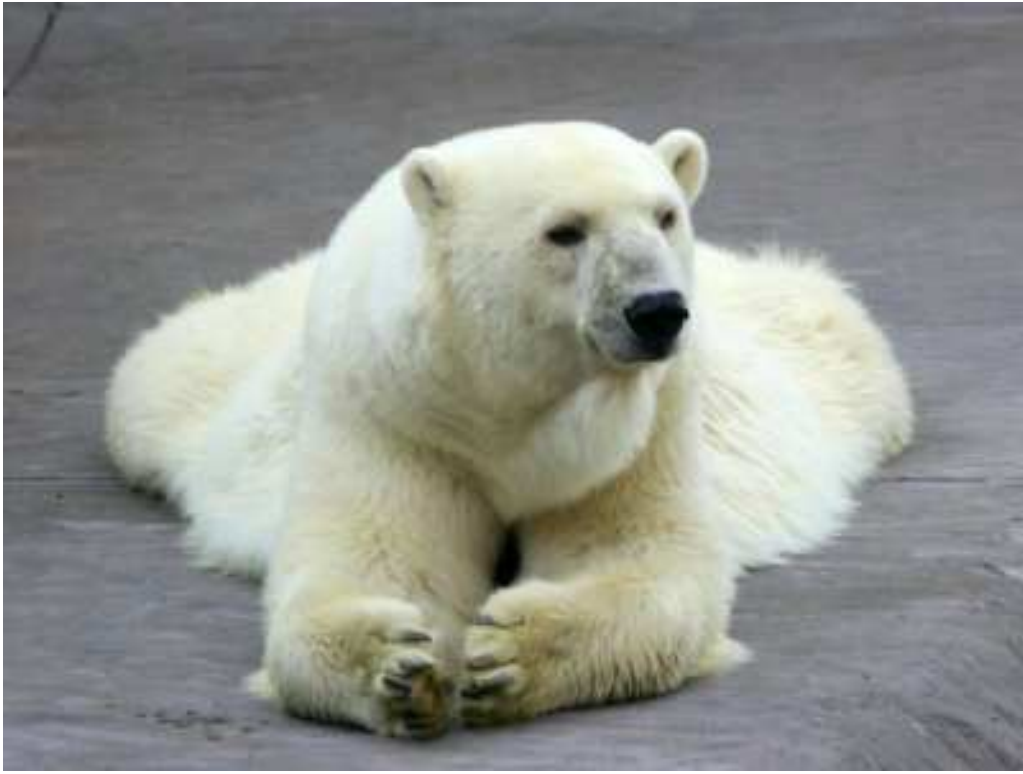

Figure 84: The source image.

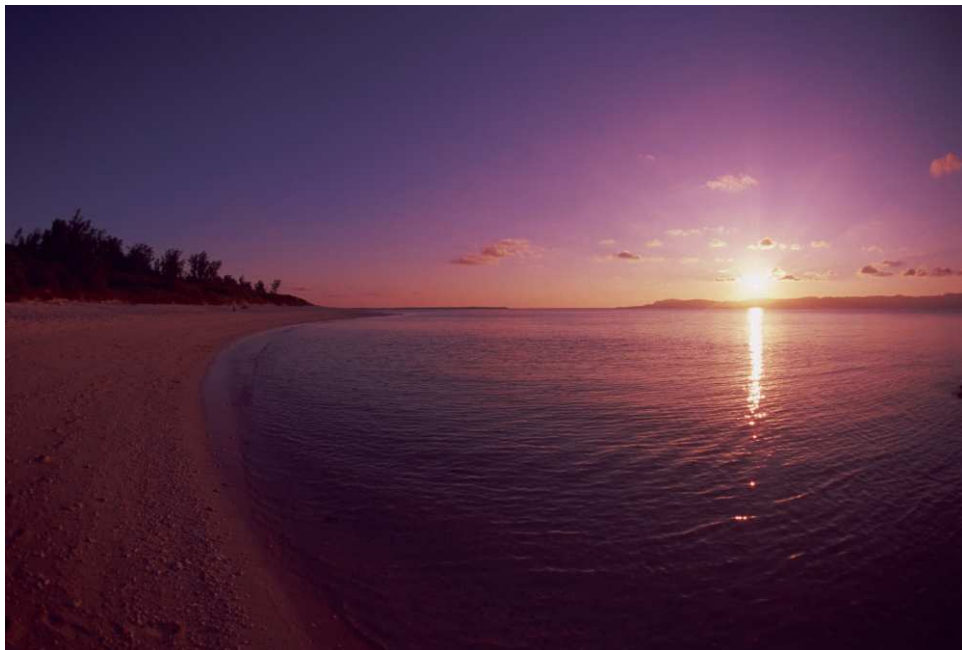

Figure 85: The destination image.

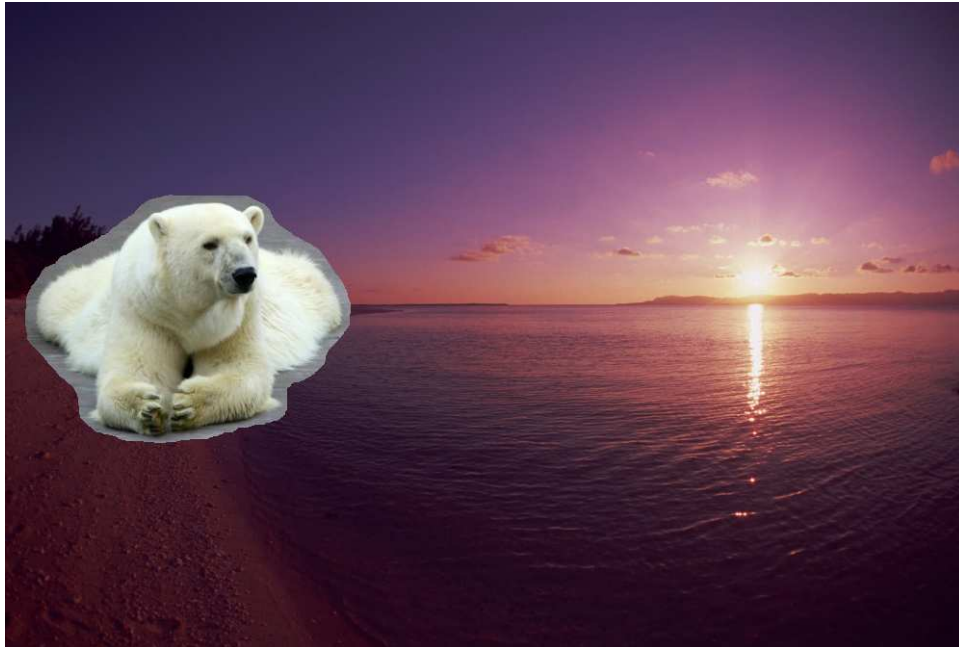

Figure 86: The result of direct cutting and pasting.

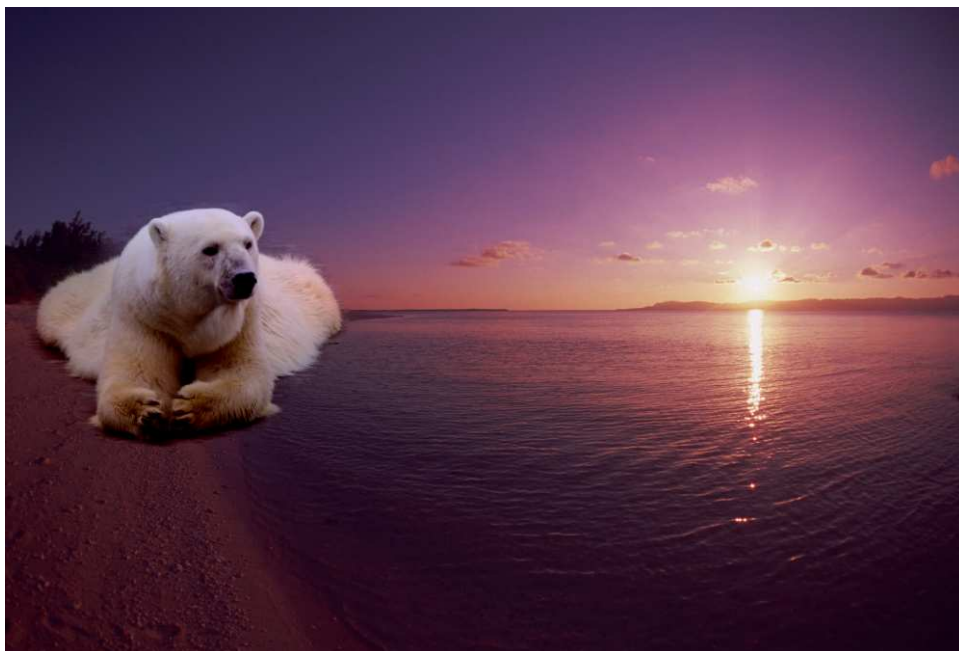

Figure 87: The result of original mvc cloning.



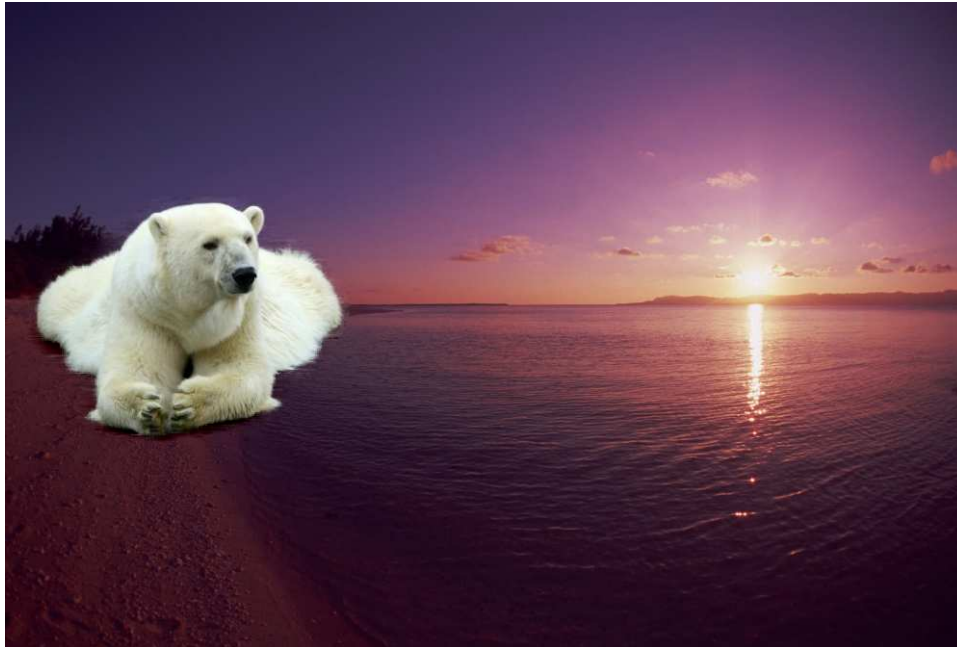

Figure 88: The result of Ding's method.

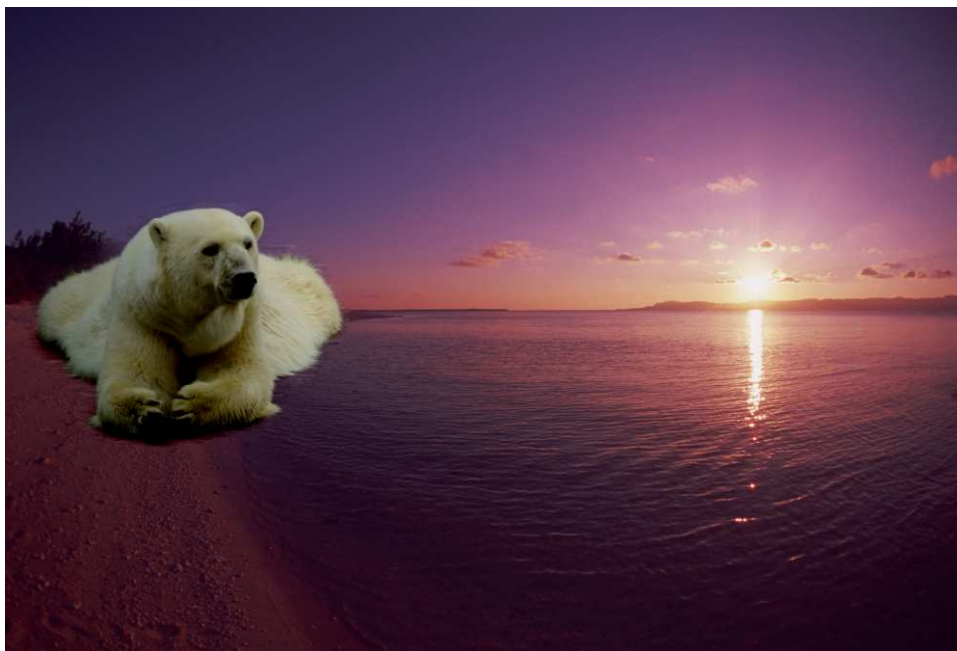

Figure 89: The result of Zhang et al.'s method.

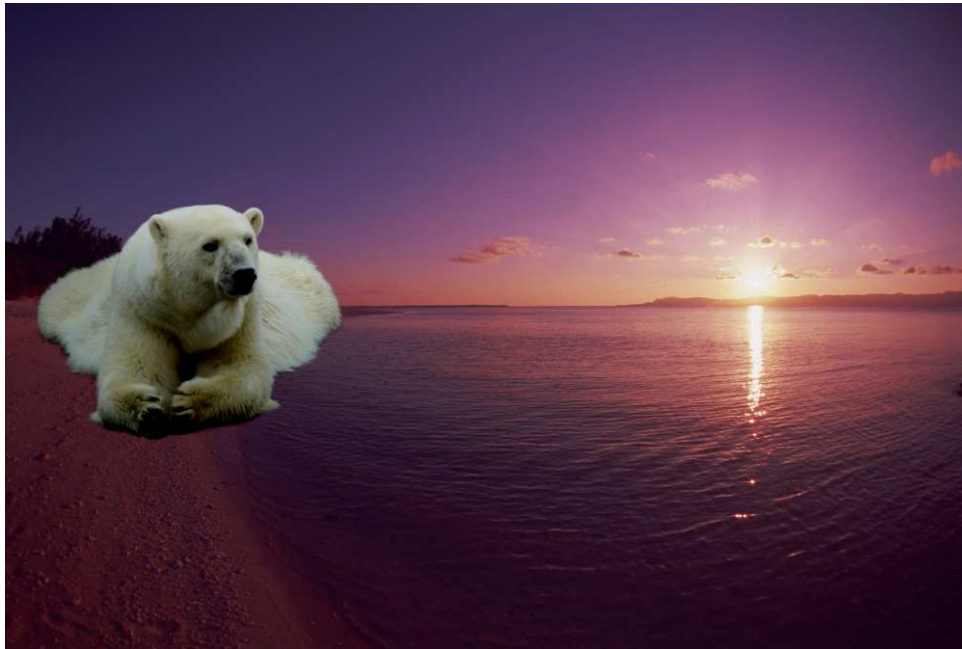

Figure 90: Our result.

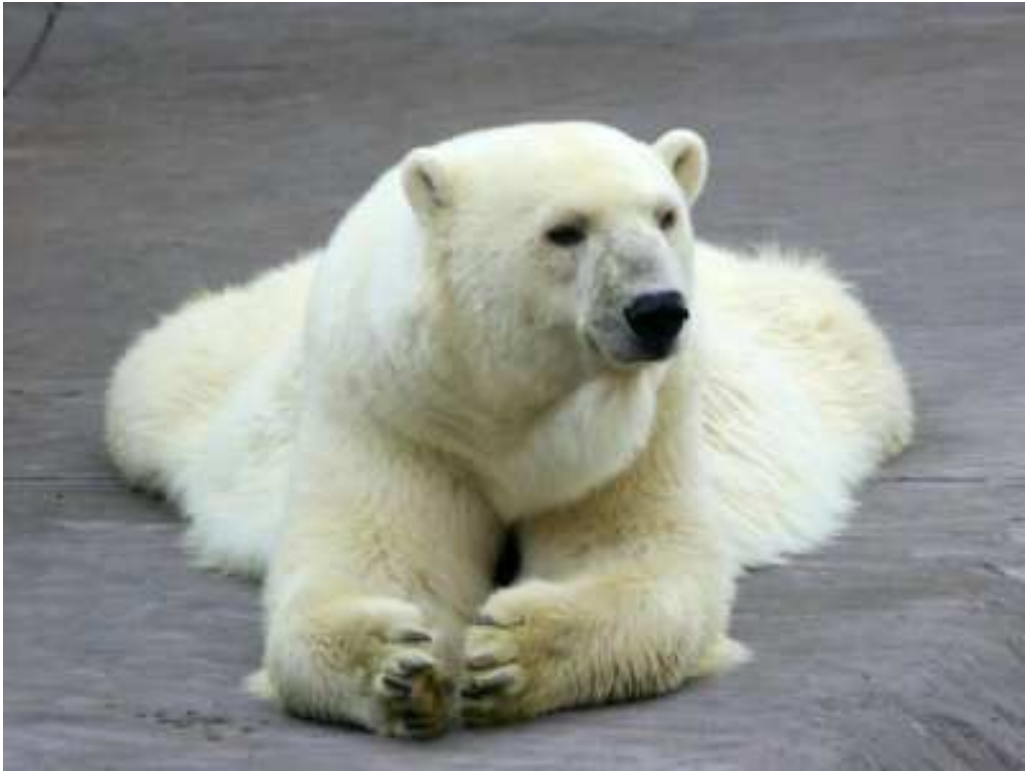

Figure 91: The source image.

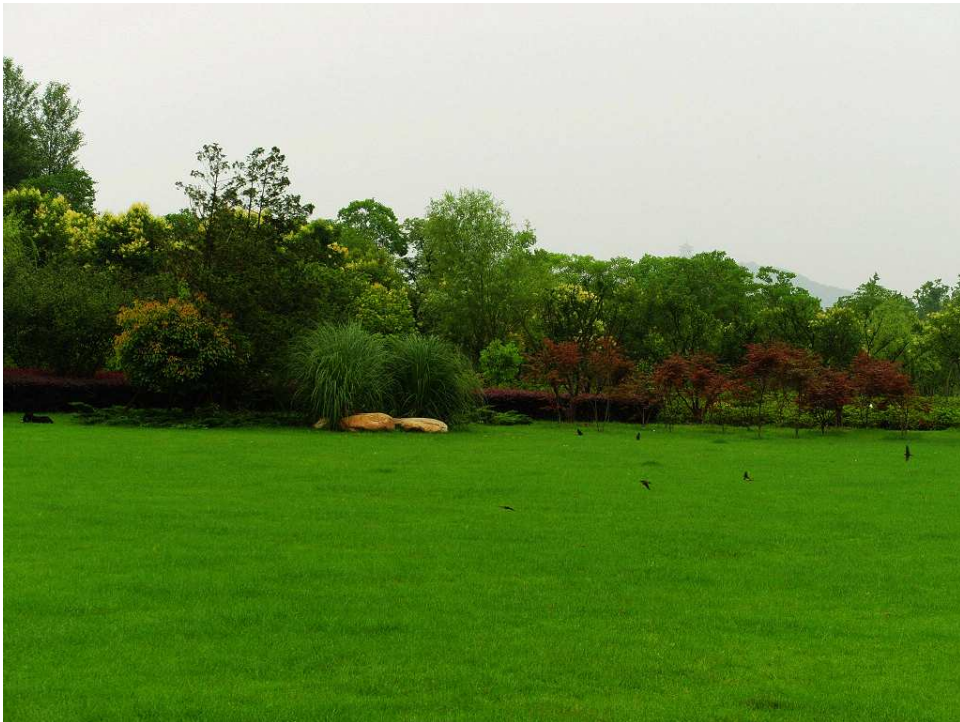

Figure 92: The destination image.

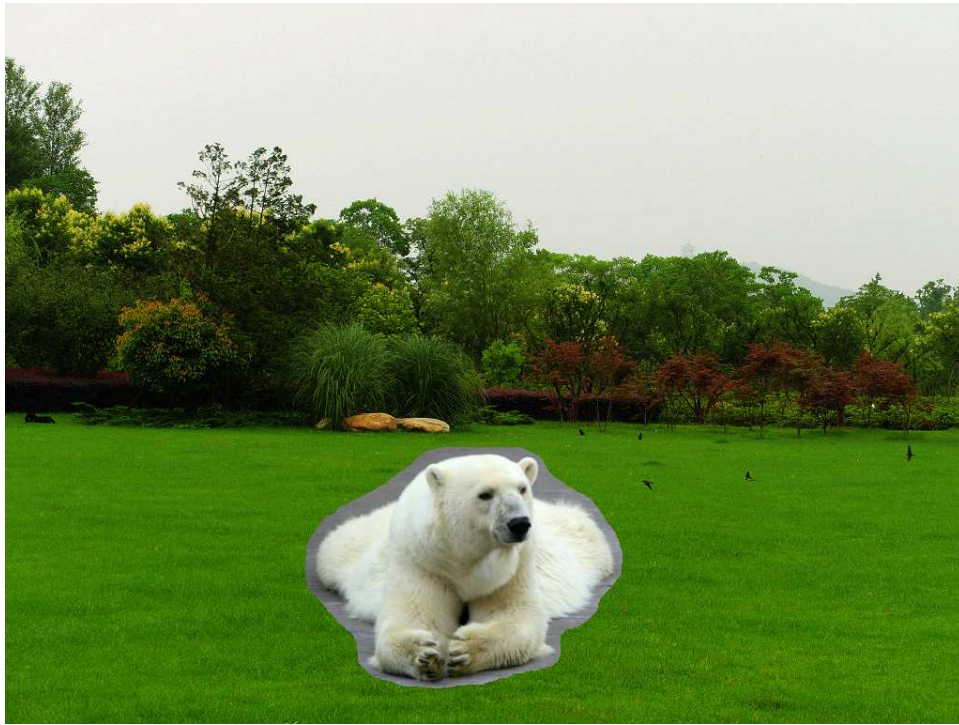

Figure 93: The result of direct cutting and pasting.

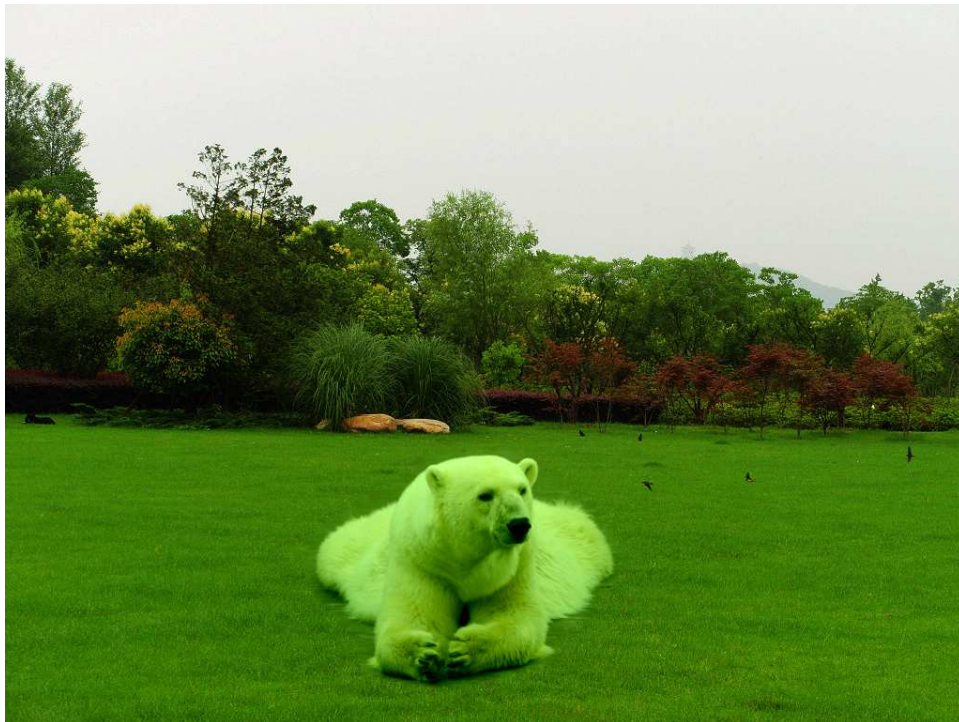

Figure 94: The result of original mvc cloning.

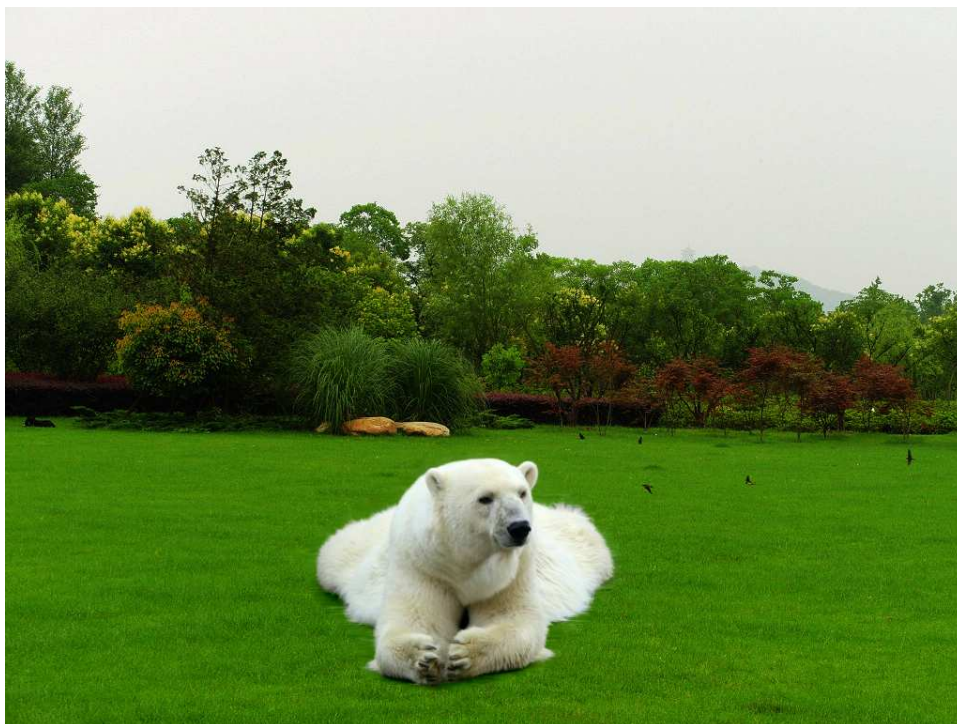

Figure 95: The result of Zhang et al.'s method.

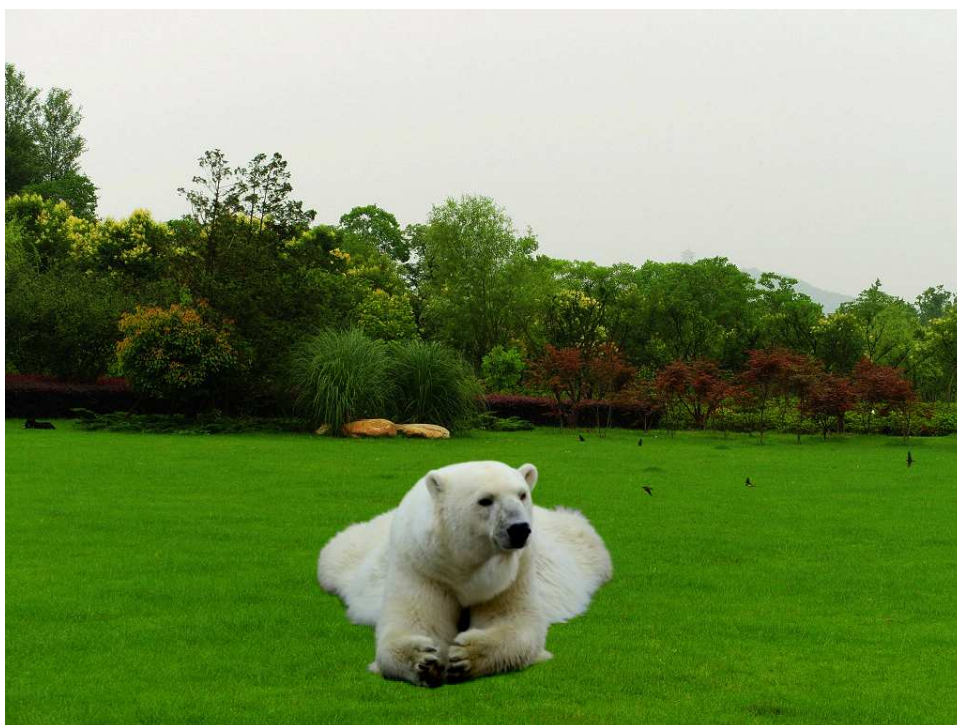

Figure 96: Our result.
